# Supplementary material for: Input–output maps are strongly biased towards simple outputs
Source: PubMed Central journal article supplement (PMC5823903; doi:10.1038/s41467-018-03101-6), 2018-02-22
Supplement: 41467_2018_3101_MOESM1_ESM.pdf [file 41467_2018_3101_MOESM1_ESM.pdf]

1 SUPPLEMENTARY NOTE 1

2 **Algorithmic Information Theory (AIT)**

3 In this section we briefly provide some basic notation, definitions, and key results of algorithmic information theory  
4 (AIT) that are used in the main text and in further appendices. Fuller descriptions can be found in ref. 1, which is a  
5 standard reference for AIT. Other good introductions can be found for example in refs. 2 and 3.

6 **Basic notation and definitions**

7 *Notation*

8 Throughout this text, the length of a binary string  $x$  is denoted as  $l(x)$ . The set of all binary strings  $x$  of length  
9  $l(x) = n$  is denoted by  $\{0, 1\}^n$ ; the set of all binary strings of length  $\leq n$  is written as  $\{0, 1\}^{\leq n}$ ; the set of all possible  
10 binary strings is denoted  $\{0, 1\}^*$ . For a string  $x$ ,  $x^n$  represents  $n$  concatenated copies of the string  $x$ . For example,  
11  $0^4 = 0000$ .

12 We follow standard usage of the notation  $\mathcal{O}(1)$  as in AIT and physics<sup>4</sup>: For a function  $\zeta(u)$  we write  $\zeta(u) =$   
13  $\gamma(u) + \mathcal{O}(1)$  if for all  $u$ ,  $|\zeta(u) - \gamma(u)| < M$ , for some constant  $M$ . For example, if  $f(u) = u + 2$  or  $f(u) = \sin(u) + u$ ,  
14 then we can write  $f(u) = u + \mathcal{O}(1)$ .

15 *Universal Turing Machines*

16 *Turing machines* are abstract generic digital computation devices proposed in 1936 by Alan Turing<sup>5</sup>. A *universal*  
17 *Turing machine* (UTM) is a Turing machine that can simulate the behaviour of any other Turing machine, and  
18 a programming language that can be used to implement a UTM is called *Turing complete*. Most commonly used  
19 programming languages are Turing complete.

20 One reason that UTMs are important is because of a hypothesis known as the *Church-Turing thesis* which states  
21 that any effectively computable function can, in principle, be calculated by a UTM. This thesis, although not formally  
22 proven, is widely believed to be true.

23 Interestingly, Turing's motivation for inventing UTMs was to prove that there are calculations a computer cannot  
24 do. If a program running on a UTM stops and presents an output after a finite number of steps, the program is said  
25 to *halt*. Turing famously showed that there is no universal way to decide whether any given arbitrary program will  
26 halt or not. This principle, which has deep implications for the philosophy of mathematics and computer science, is  
27 called the *halting problem*.

28 It is customary in AIT to prove results for binary strings, a convention we will follow below. This convention can  
29 be understood intuitively by recognising that in principle any discrete object can be reduced to a binary string by a  
30 standard indexing procedure. Also, since a UTM can simulate any other UTM, and UTMs can be defined that take  
31 binary strings as their input, there is no loss of generality in this convention.

32 Proving that a given map is Turing complete is often not straightforward. However one simple test for proving that  
33 a map is *not* Turing complete is to establish that all input programs halt. A *computable* map (or function) is one  
34 that produces an output and then halts for all valid inputs. By this criterion, we see that many maps used in science  
35 and engineering are computable; for example, any RNA nucleotide sequence we present to the Vienna computational  
36 folding package<sup>6</sup> will adopt *some* secondary structure (i.e. output), and not keep running indefinitely. Nevertheless,  
37 there are important examples of physical systems that can be mapped onto UTMs, and thus have properties that are  
38 undecidable because they are equivalent to solving the halting problem<sup>7,8</sup>. But these will not concern us here.

39 **Basics of Kolmogorov-Chaitin complexity**

40 *Definition of Kolmogorov-Chaitin complexity*

41 The historical development of AIT by Solomonoff<sup>9</sup>, Kolmogorov<sup>10</sup> and Chaitin<sup>11,12</sup> was motivated by attempts to  
42 quantify the information content or randomness of individual objects such as binary strings or discrete geometries. In  
43 this way, AIT contrasts with the better known Shannon information theory which focuses on distributions instead of  
44 on individual objects. For example, even if individual strings in a distribution vary enormously in their complexity,

Shannon information only picks up the frequency with which each string appears, which may be unrelated to the complexity of an individual string. AIT does not measure the properties of the distribution, but instead quantifies the complexity of an individual string. Nevertheless, there are important relationships between AIT and Shannon information theory, see e.g. the standard references cited above or ref. 13 for an overview.

The fundamental insight of AIT is that the information content of an object can be defined algorithmically, by the minimum amount of information needed to describe or generate that object. Consider for example the following binary strings

$$\begin{aligned}(01)^n &= 01010101010101010101\dots \\ \text{rand}(1:n) &= 100111010101110001011111\dots\end{aligned}$$

The first is intuitively ‘simple’ as the whole string can be described as “print ‘01’  $n$  times”. Since the string conforms to a simple rule, and thus also a short description, the string is deemed simple in AIT. The second string is a typical randomly generated bit-string. Assuming that there are no hidden patterns in this string and that it does not conform to any simple rules or short description, then the shortest description may simply be to print the string in full. Hence it is deemed complex.

AIT characterises the information content, or *Kolmogorov-Chaitin complexity*, of an output  $x$  as the length of the shortest computer program that can generate  $x$ . More formally, the (plain) Kolmogorov-Chaitin complexity or simply Kolmogorov complexity  $C_U(x)$  of a binary string  $x$  is defined as

$$C_U(x) = \min_q \{l(q) : U(q) = x\} \quad (1)$$

where  $l(q)$  is the length of a binary program  $q$  in bits, and  $U$  is a UTM. That is,  $C_U(x)$  is the length of the shortest program over all programs that print  $x$  and then halt. It is well known that  $C_U(x)$  is *uncomputable*, meaning that even in principle there cannot exist a general algorithm for finding the exact value of  $C_U(x)$ , given  $x$ . This is established by reducing the problem of calculating  $C_U(x)$  to the *halting problem*.

#### *The invariance of complexity*

The *invariance theorem* is a cornerstone of AIT. It states that  $C_U(x)$  only depends on the choice of the UTM  $U$  up to an additive constant. That is, if  $U$  and  $V$  are both UTMs, then

$$|C_U(x) - C_V(x)| \leq c \quad (2)$$

for any  $x$ , where  $c$  is a constant independent of  $x$ , but depending on the choice of  $U$  and  $V$ . Intuitively, since one can always write a compiler to transform  $U$  to  $V$ , the constant  $c$  is smaller or equal to the size of the compiler. In the limit of large complexities this difference can be ignored, or alternatively, one can simply say that the Kolmogorov complexity is only defined up to a constant. Hence the subscript is dropped and we speak of ‘the’ Kolmogorov complexity  $C(x)$ .

A few quick notes. Firstly,  $C(x)$  is always defined with respect to a particular UTM. The invariance theorem simply tells us that up to a constant, it does not matter what UTM is used. Secondly, the invariance theorem also does not mean that Kolmogorov complexity is the shortest description of a string  $x$  for any UTM. For example, it is always possible to define a UTM that has a particular string  $x$  stored, so that  $C(x)$  is effectively zero for that string. It is worth quoting ref. 1 (pp 106) on this topic: *The key point is not that the universal description method necessarily gives the shortest description length in each case, but that no other description method can improve on it infinitely often by more than a fixed constant.*

#### *Most strings are complex*

Most binary strings have a Kolmogorov complexity close to their length in bits. This follows from the following simple counting argument: for a given number of bits  $n$ , there are  $2^n$  different strings in  $\{0, 1\}^n$ , and  $2^n - 1$  shorter strings in the set  $\{0, 1\}^{\leq(n-1)}$ . There are enough strings that any of the  $2^n$  strings in the former set might be compressed to one in the latter set. However,  $2^{n-1}$  of these strings are just one bit shorter, so at best, 50% of the strings in  $\{0, 1\}^n$  can be compressed by at most one bit. More generally, at most a fraction of  $2^{-k}$  of strings in  $\{0, 1\}^n$  are compressible by exactly  $k$  digits, because there are only  $2^{n-k}$  binary strings of that length available. More generally, the fraction of strings of length  $n$  that can be compressed by at least  $k$  digits is  $2^{-k+1} - 2^{-n}$ . For example, for strings of length  $n = 100$ , only about 0.2% can be compressed by  $k = 10$  bits or more. In other words, 99.8% of

88  $n = 100$  strings cannot be compressed to less than 90% of their length. A string is considered to be *algorithmically*  
 89 *random* if it cannot be compressed by more than a few bits, and as seen in this example, most strings can only be  
 90 compressed by a relatively small amount. Therefore, a randomly chosen string is likely to be algorithmically random.

91

### Prefix complexity

92 For technical reasons, as emphasised by Chaitin, it is often convenient to work with *prefix-codes* or *instantaneously*  
 93 *decodable* codes for which the set of code words (i.e. programs) is prefix-free<sup>1</sup>, that is, if  $q$  and  $r$  are both valid  
 94 programs which can produce outputs, then in a prefix code  $q$  cannot form the first  $l(q)$  bits (i.e. it cannot form a  
 95 prefix) of program  $r$ , and vice versa. This implies that there is no need for a spacer or other symbol to mark the  
 96 beginning and end of concatenated programs. Hence any string of bits can be unambiguously decoded into separate  
 97 programs.

98 Having introduced the plain complexity  $C(x)$ , we now define the closely related *prefix complexity*  $K_W(x)$ <sup>11,14</sup>:

$$K_W(x) = \min_q \{l(q) : W(q) = x\} \quad (3)$$

99 where  $W$  is a prefix UTM i.e.  $W$  is a *self-delimiting machine* where the programs are prefix-free. As above for the  
 100 plain complexity  $C(x)$ , an invariance theorem holds for its prefix-free analogue, and so we can drop the subscript of  
 101  $W$  on  $K_W(x)$ . While  $K(x)$  differs from  $C(x)$  in important technical ways, quantitatively they are in fact very close,  
 102 as  $K(x)$  is also uncomputable, being equal to  $C(x)$  up to a term logarithmic in  $C(x)$ : It is known<sup>1</sup> that

$$C(x) \leq K(x) \quad (4)$$

$$\leq C(x) + \log_2(C(x)) + 2 \log_2 \log_2(C(x)) + \mathcal{O}(1) \quad (5)$$

$$\sim C(x) \quad (6)$$

103 so that the two complexity measures are normally quite close to one another.

104

### Conditional Kolmogorov complexity

105 In Shannon information theory, it is convenient to derive relationships between concepts such as joint, mutual or  
 106 conditional entropies/information. For example, the conditional information  $H(Y|X)$  is defined as the entropy in the  
 107 variable  $Y$  given that the variable  $X$  takes a particular value  $X = x$ , averaged over all possible values of  $x$ . Somewhat  
 108 analogous relationships can be derived for Kolmogorov complexity. However, in contrast to Shannon entropies, for  
 109 which these relationships are statistical averages over distributions, for Kolmogorov complexity the relationships hold  
 110 for individual objects. For example, a kind of mutual information can be defined as  $I(x : y) = K(x) + K(y) - K(x, y)$   
 111 which measures the difference between generating  $x$  and  $y$  separately, and generating them jointly (measured by  
 112  $K(x, y)$ ). Similarly, the conditional prefix Kolmogorov complexity  $K(x|y)$  can be intuitively interpreted as the length  
 113 of the shortest program that, when fed into a prefix UTM  $W$ , generates  $x$  and halts, if  $W$  is also given  $y$  “for  
 114 free”. If  $y$  is genuinely independent of  $x$ , i.e., roughly saying, if having  $y$  doesn’t help  $W$  calculate  $x$  at all, then  
 115 we expect that  $K(x|y) = K(x) + \mathcal{O}(1)$ , whereas if, say  $y = 2x$ , then it will be very easy for  $W$  to generate  $x$  and  
 116  $K(x|y) = \mathcal{O}(1) \ll K(x)$ . Note that there is a subtle difference between  $K(x|y)$  and  $K(x|y^*)$ , with the latter defined  
 117 as the conditional prefix Kolmogorov complexity given that the shortest *program* to calculate  $y$  is given.

118 We will use the following two relations:

$$K(x|y) \leq K(x) + \mathcal{O}(1) \quad (7)$$

$$K(x) \leq K(x|y) + K(y) + \mathcal{O}(1) \quad (8)$$

119 Intuitively, the first identity follows because adding information ( $y$  in this case) could mean you need less information  
 120 to generate  $x$ , and if  $y$  is completely irrelevant then you can always generate  $x$  by ignoring  $y$ . Similarly, for the second  
 121 identity, if the right side were less than  $K(x)$ , then it would represent a shorter way to generate  $x$ , which, by definition  
 122 would define the true  $K(x)$ .

123

## Universal probability and the coding theorem

124 For a prefix UTM, the probability of generating a particular input program of length  $l$  by random coin flips is  $2^{-l}$ .  
 125 The *universal probability*<sup>9,14</sup> of a string  $x$  is defined as

$$P_U(x) = \sum_{q:U(q)=x} 2^{-l(q)} \quad (9)$$

126 which is the probability that a prefix UTM  $U$  outputs  $x$  when fed with a random program  $q$  (e.g. generated by coin  
 127 flips). So the universal probability simply sums over the probability of all possible programs that generate a given  
 128 output  $x$ . One reason to use a prefix UTM is Kraft's inequality, which states that if  $\mathcal{F}$  is a set of binary prefix-free  
 129 code words, then  $\sum_{f \in \mathcal{F}} 2^{-l(f)} \leq 1$  which ensures that  $\sum_x P_U(x)$  converges. However, because of the halting problem,  
 130 it is impossible to know in general if a given program  $q$  will halt. If a program does not halt, then it does not produce  
 131 any output, and there would be some probability mass absorbed by these non-halting programs. Hence summing  
 132 over halting programs would yield a mass of less than 1. Thus strictly  $P_U(x)$  is a semi-measure; it can only be  
 133 approximated from below, and  $\sum_x P_U(x) \leq 1$ .

134 The (algorithmic) *coding theorem* was established by Leonid Levin in 1974<sup>14</sup>. It connects  $K(x)$  and the universal  
 135 probability  $P_U(x)$  as follows

$$2^{-K(x)} \leq P_U(x) \leq 2^{-K(x)+d} \quad (10)$$

136 where  $d$  is some constant independent of  $x$ , but possibly depending on the choice of UTM,  $U$ . The coding theorem  
 137 can be expressed differently as

$$P_U(x) = 2^{-K(x)+\mathcal{O}(1)} \quad (11)$$

138 Because the invariance theorem implies that  $P_U(x)$  is asymptotically independent of  $U$ , the subscript  $U$  is convention-  
 139 ally dropped, and instead one just writes  $P(x)$ . In essence this theorem says that the probability of a UTM printing  
 140  $x$  when fed with a random program is largely determined by the Kolmogorov complexity of  $x$ : Low complexity or  
 141 'simple' outputs are highly probable, while highly complexity outputs are exponentially less likely. The fact that the  
 142 lower bound  $P(x) \geq 2^{-K(x)}$  holds is clear, as the summation in equation (9) contains the term  $2^{-K(x)}$ . This lower  
 143 bound was in fact pointed out earlier by Solomonoff<sup>9</sup>, although he didn't use prefix machines. The contribution of  
 144 Levin was to show that the upper bound  $P(x) \leq 2^{-K(x)+d}$  also holds (for some constant  $d$ ). This latter claim is neither  
 145 obvious nor trivial in the UTM setting<sup>1,14,15</sup>. For example, for UTMs there are infinitely many possible programs,  
 146 and so *a priori* we might expect that some high complexity outputs could nevertheless have high probability because  
 147 many longer programs generate them. The coding theorem shows that this is not generally the case.

148

## SUPPLEMENTARY NOTE 2

149

### Upper bound on probability for computable maps

150 In the main text we apply the following upper bound for computable maps:

$$P(x) \leq 2^{-K(x|f,n)+\mathcal{O}(1)} \quad (12)$$

151 where  $K(x|f,n)$  is the complexity of an output  $x$ , given the map  $f$  and given  $n$ , which parametrises the size of the  
 152 input space  $I$  of the input-output map, e.g. for binary sequences of fixed length  $n$ , the size is  $2^n$  possible inputs. This  
 153 equation (or something similar to it) for the upper bound can be found in standard texts such as refs. 3 and 1, but  
 we also provide a derivation here, following a standard method.

154

155 Consider the following algorithm  $A$ :

156

- 157 (i) Enumerate all inputs using  $n$ .
- 158 (ii) Map these inputs to their outputs, according to the rules specifying the map  $f$ .
- 159 (iii) Print the resulting list of each output  $x$  and its corresponding probability  $P(x)$  (i.e. frequency in  $I$ ).

160

161 Since  $f$  and  $n$  are given, the complexity of the algorithm is  $K(A) = \mathcal{O}(1)$ . This procedure is an example of a well  
 162 known result of AIT, namely that enumerating all possible objects in a set can be algorithmically much simpler than

163 generating a typical element of the set. For example, the information required to construct  $\{0,1\}^n$ , the set of all  
 164 binary strings of length  $n$ , is only about  $\log_2(n) + \mathcal{O}(1)$  bits, and possibly much less for very simple  $n$ , whereas a  
 165 typical member  $x$  of this set has close to maximal complexity, i.e.  $K(x) = n + \mathcal{O}(1)$ . Hence enumerating the whole set  
 166 requires much less information than does specifically generating one typical member. In the same way, the procedure  
 167 above to generate all outputs can require substantially less information than the information needed to generate a  
 168 specific output  $x$ .

169 Now, it is well known from information theory<sup>15</sup> that given a discrete distribution, one can efficiently encode outputs  
 170 using a Shannon-Fano-Elias (SFE) code, which consists of prefix-free code words  $E(x)$  of length (in bits)

$$l(E(x)) = \left\lceil \log_2 \left( \frac{1}{P(x)} \right) \right\rceil + 1 \quad (13)$$

171 where  $\lceil \cdot \rceil$  denotes taking the integer part. In this manner, we have a method for assigning bit strings to outputs  $x$ . So,  
 172 using a SFE code, and given  $f$  and  $n$ , we can describe any output  $x$  using  $l(E(x)) + \mathcal{O}(1)$  bits, where the  $\mathcal{O}(1)$  term  
 173 accounts for the fixed program to generate the SFE code. Because Kolmogorov complexity gives the shortest possible  
 174 description length (within  $\mathcal{O}(1)$  terms) for a given UTM, we must have that  $K(x|f, n)$ , which is the information (in  
 175 bits) required to specify a given output  $x$ , given the input-output map  $f$  and  $n$ , is no larger than the SFE code  
 176 description just derived, i.e.

$$K(x|f, n) \leq l(E(x)) + \mathcal{O}(1) \quad (14)$$

$$= \log_2 \left( \frac{1}{P(x)} \right) + \mathcal{O}(1) \quad (15)$$

$$\Rightarrow P(x) \leq 2^{-K(x|f, n) + \mathcal{O}(1)} \quad (16)$$

177 Note that we are abusing notation slightly, since we have used the letter  $f$  to denote both the *function*, as well as  
 178 to denote the *program* for implementing the function  $f$ . Similarly we have written  $n$  to denote both the number as  
 179 well as a program to calculate it, although for most  $n$  the size of the programme  $n^*$  will be  $\log n + \mathcal{O}(1)$  since most  
 180  $n$  are not compressible. So technically we should write  $K(x|f^*, n^*)$ , but for simplicity of notation we simply write  
 181  $K(x|f, n)$ .

## 182 SUPPLEMENTARY NOTE 3

### 183 Limited complexity maps

184 Equation (12) is a very general statement that applies to a wide range of functions  $f$ . However, the details of  
 185  $f$  can affect the output probabilities  $P(x)$ . For instance, if for a given output  $x$  and mapping function  $f$  one has  
 186  $K(x|f, n) \ll K(x)$ , so that  $2^{-K(x|f, n)} \gg 2^{-K(x)}$ , then  $x$  would have a much higher probability to appear than  
 187 predicted by the coding theorem. In other words, in this case, even if one knows  $K(x)$ , it is necessary to know the  
 188 details of the map  $f$  in order to make predictions about  $P(x)$ .

189 We will leave the case of making predictions about  $P(x)$  for general maps  $f$  for future work. In this manuscript, we  
 190 instead consider one important special case, namely maps of limited complexity, which we define as maps for which  
 191 asymptotically, i.e. for large  $x$ ,  $K(f) + K(n) \ll K(x) + \mathcal{O}(1)$  holds. Using standard inequalities we can then show  
 192 that

$$\left. \begin{array}{l} K(x) \leq K(x|f, n) + K(f) + K(n) + \mathcal{O}(1) \\ K(x|f, n) \leq K(x) + \mathcal{O}(1) \\ K(f) + K(n) \ll K(x) + \mathcal{O}(1) \end{array} \right\} \Rightarrow K(x) \approx K(x|f, n) + \mathcal{O}(1) \quad (17)$$

193 from which it follows that occurrences of  $K(x|f, n) \ll K(x)$  are asymptotically negligible, and so the inequality (12)  
 194 becomes

$$P(x) \lesssim 2^{-K(x) + \mathcal{O}(1)} \quad (18)$$

195 which is asymptotically independent of  $f$  and  $n$ . Of course  $f$  and  $n$  still define the set of  $x$  that are possible, but  
 196 given an  $x$ , this inequality holds for the probability that it is generated upon uniform sampling of inputs. It is not  
 197 hard to see that for limited complexity maps it is the case that  $K(x) = K(\text{set of all inputs that generate } x) + \mathcal{O}(1)$ ,  
 198 since the the set can generate  $x$  and given  $x$  the set can be generated by enumerating all inputs and checking those

that generate  $x$ . Thus, as in the main text, for limited complexity maps, the structural variation in outputs  $x$  is generated with as little artefactual biasing from the mapping rule-set as possible. If instead the map *itself* clearly determines many aspects of output structure irrespective of input choice, then any complexity in these aspects must be due to artefactual biasing of the map, and not the information contained in a given input. In the main text and in Supplementary Note 12 we show an explicit matrix based map which is generally not a limited complexity map, and therefore fails this “no artefactual biasing” test.

Our arguments above invoke  $K(f) \ll K(x)$  and  $K(n) \ll K(x)$  for a typical  $x$ . Most examples we explore are maps of fixed complexity  $K(f) = \mathcal{O}(1)$ , for which one can always find large enough  $x$  so that these inequalities clearly hold. Since  $K(n)$  scales asymptotically as  $\log(n)$  it would seem that simplicity bias should also hold for maps that scale as  $\log(n)$ , e.g. ones that are not necessarily fixed. On the other hand, if  $K(f)$  scales linearly with  $n$  (which is how  $K(x)$  scales) or more (e.g. in the matrix map  $K(f) \sim \mathcal{O}(n^2)$ ) then the inequality won't hold. So exactly what maximum scaling of  $K(f)$  with  $n$  is possible for the map  $f$  to still show simplicity bias phenomenology, and exactly how this works for maps that we coarse-grain, where  $n$  is less well defined, remain open questions for future investigations.

Another very interesting finding for the maps we study in this paper is that our simplicity bias predictions still work when  $x$  is small enough that we do not expect the  $K(f) \ll K(x)$  to strictly hold. For an example, in Supplementary Note 9 we explore the effect of input length on the prediction of simplicity bias for the input-output map from an RNA sequence to its corresponding secondary structure. While  $K(f)$  is not known for the Vienna package<sup>16</sup>, the software package used here to obtain those secondary structures<sup>6</sup>,  $K(f)$  is likely to be greater than the small number of bits necessary to describe the 20 letter-long outputs from this map. And yet, we clearly observe simplicity bias for this map. On the other hand, in Supplementary Note 9 we show that for very short RNA strands, the simplicity bias predictions we make start to break down, as expected. Although the general arguments used to derive our upper bound can only be proven to hold in the limit of larger outputs  $x$ , we conjecture that these basic properties survive when moving out of this asymptotic regime and into regimes where  $K(f) \ll K(x)$  may no longer strictly hold. It is not uncommon in physics and mathematics to find that an asymptotic law still works qualitatively outside of the domains for which it can be proven to hold. Something similar is likely to be at work here, meaning that our general predictions about simplicity bias have a wider domain of applicability than one might at first assume. Exactly how this works, and how it may depend on the scaling of  $K(f)$  with  $n$  remain open questions for future work.

Finally, while we have mainly studied examples of fixed complexity maps, for the matrix maps with certain types of circulant matrices, described in Supplementary Note 12, we find very preliminary evidence that suggests that the simplicity bias holds not only for maps of fixed complexity, but also for maps where  $K(f)$  grows asymptotically as  $K(f) \sim \log(n)$ , as we anticipated above. In the limit of large  $x$  the derivations above for equation (12) above still holds, but further investigation is necessary to work out more generally when and how simplicity bias depends on particular properties of the matrix map. It may be, for example, that it is most pronounced for the simpler fixed maps.

## SUPPLEMENTARY NOTE 4

### Limited complexity maps without simplicity bias

#### Linear maps cannot show bias

In the main text, we claim that for an input-output map to show simplicity bias,  $f$  must be a nonlinear function of its inputs. This is because linear transformations are not biased towards any outputs, as we show now.

If  $f$  were linear then its domain  $I$  is a discrete subset of a finite-dimensional space;  $f$  would also be bounded and continuous. This would imply that if two inputs are close in input space, the corresponding outputs would also be close to each other<sup>17</sup>. Likewise, any distance in input space will translate into a proportional distance in output space.

Moreover, while a linear transformation does not necessarily preserve angles between lines or distances between points, it does preserve ratios of distances between points lying on a straight line. Because of this property, if one were to select inputs on a grid, the ratios of the distances between the points on the grid would not be affected by the input-output map. The linear transformation would map the grid in input space to the grid in output space, and no point in output space would be “denser” - in terms of having more outputs in its neighbourhood - than any other point.

In a similar way, if instead of selecting inputs from a grid one were to sample them uniformly from a bounded subset of input space, this uniform distribution would still be present in output space, as the corresponding outputs would also be uniformly distributed. In summary, a linear map cannot produce bias towards any outputs. Therefore, for a map to show simplicity bias (or any kind of bias for that matter), it must be a nonlinear function of its inputs.

**Simplicity bias is not a necessary consequence of conditions 1-5**

251

252 In the main text we gave five conditions on maps which we conjecture are usually sufficient for observing simplicity  
253 bias. That is, we suggest that typical real-world maps satisfying these conditions will show simplicity bias.

254 However, it is important to point out that these five conditions do not in fact *necessitate* that the map will show  
255 bias. As a very simple counter example, consider a map which prints the first  $n/2$  bits of  $n$ -bit inputs strings. This  
256 map has  $N_I \gg N_O$ , and the map is simple. Nevertheless, the output is a uniform distribution over  $\{0,1\}^{n/2}$ , and  
257 hence there is neither bias, nor simplicity bias. Of course, this projection map is a linear map, and so it does not  
258 satisfy the condition of linearity which we imposed. However, it could easily be altered slightly to make it nonlinear,  
259 while retaining a roughly uniform distribution. For example, we could alter the definition of the map to ‘*print  $0^n$  if*  
260 *the sum of first  $n/2$  digits is a prime number; otherwise print the first  $n/2$  digits*’. This distribution would be biased  
261 toward the outputs  $0^{n/2}$ , but otherwise be uniform over the others.

262 The point of this perhaps rather artefactual example is to illustrate that one can create maps that satisfy our  
263 conditions, but do not display simplicity bias. Nevertheless, for all the real-world systems we examined in this work,  
264 we find that simplicity bias holds. So we conjecture that our five conditions are sufficient for most non-UTM maps  
265 that are generated from real-world systems. But this conjecture could be tested with further examples. Working  
266 out the exact formal necessary and sufficient requirements for simplicity bias in non-UTM contexts would form an  
267 interesting future project.

268

**SUPPLEMENTARY NOTE 5**

269

**Estimating the range of  $K(x|f, n)$**

270 We will now estimate the range of values for  $K(x|f, n)$  with  $x \in O$ . We begin with a lower bound on possible  
271 complexity values: Given  $f$  and  $n$  we can compute all the inputs, and produce all  $N_O$  outputs. Hence, we can  
272 describe any  $x \in O$  by its index  $1 \leq j \leq N_O$  in the set of outputs  $O$ . Therefore

$$K(x|f, n) \leq \log_2(j) + \mathcal{O}(\log_2(\log_2(j))) + \mathcal{O}(1) \quad (19)$$

273 where the second  $\mathcal{O}(\log_2(\log_2(j)))$  term arises from the fact that the description is in prefix-free form. Since at least  
274 one output should have an index of  $j = 1$ , for that output all terms containing  $\log_2(j)$  will be equal to zero, resulting  
275 in a lower bound for the range of  $K(x|f, n)$ :

$$\min_{x \in O} (K(x|f, n)) = \mathcal{O}(1) \quad (20)$$

276 Another slightly cruder way of estimating the minimum value of  $K(x|f, n)$  follows from simply noting that the  
277 probability  $P(x)$  should be always be less than one. In that case, our upper bound equation (12), implies that  
278  $\min_{x \in O} K(x|f, n) \gtrsim 0$ .

279 For an upper bound on  $\max_{x \in O} K(x|f, n)$ , the indexing argument from equation (20) suggests that

$$\max_{x \in O} (K(x|f, n)) \leq \log_2(N_O) + \log_2(\log_2(N_O)) + \mathcal{O}(1) \quad (21)$$

280 It is possible to derive a similar upper bound using a standard AIT argument: if all strings can be used as programs  
281 that encode a map’s outputs, then there are at most  $\sum_{l=1}^M 2^l = 2^{M+1} - 1$  programs of length  $l \leq M$ . However, since  
282 we are using prefix codes, not all strings are available, and only roughly  $2^M$  out of the set of all  $2^{M+1} - 1$  programs  
283 can be used. For  $N_O$  outputs, this argument implies that one would need strings made of up to  $\log(N_O)$  bits to  
284 encode all outputs, thus imposing an upper bound of  $\log(N_O)$  on  $K(x|f, n)$ . Taken together, these arguments suggest  
285 the following range:

$$0 \leq K(x|f, n) \leq \log_2(N_O) + \mathcal{O}(1) \quad (22)$$

286 our upper bound equation (12) would then satisfy:

$$\frac{1}{N_O} \leq 2^{-K(x|f, n) + \mathcal{O}(1)} \leq 1. \quad (23)$$

287 The upper bound on our bound is in a sense trivial, as the probability of an output cannot be greater than 1. The  
 288 lower bound is just the average value of  $P(x)$  given that there are  $N_O$  outputs. Just to be clear, the lower bound  
 289 above is not a lower bound for the probability  $P(x)$  of an output: it is the expected *lowest* value for the *upper* bound  
 290  $P(x) \leq 2^{-K(x|f,n)+\mathcal{O}(1)}$ , which is a decreasing function of  $K(x|f,n)$ . In other words, the upper bound on  $P(x)$  –  
 291 which for any given  $K(x|f,n)$  gives the upper bound on the probability of outputs with that value of  $K(x|f,n)$  – can  
 292 be expected to roughly vary between these two extremes as a function of  $K(x|f,n)$ . The actual probabilities  $P(x)$ ,  
 293 on the other hand, can be closer or further from the bound. For example, the bound above tells us that  $P(x)$  for the  
 294 most complex outputs will be less than  $1/N_O$ . This upper bound does not preclude there being that many  $x$  in this  
 295 set for which  $P(x) \ll 1/N_O$ , in fact for highly biased distributions we might expect this to be the case for the high  
 296 complexity outputs. If there is bias in the distribution there are likely many outputs within the whole set  $x \in O$  that  
 297 have  $P(x) < 1/N_O$ , since  $\sum_{o=1}^{N_O} P(x_o) = 1$ .

## 298 SUPPLEMENTARY NOTE 6

### 299 Sampling inputs produces outputs close to the bound

300 The upper bound on the probability to obtain a certain output on its own this does not say much about how close  
 301 we expect an actual  $P(x)$  to be to this bound. In this section, we derive a lower bound for  $P(x)$  when  $x$  is *produced*  
 302 *from a random input* (See also discussions in refs 3 and 1).

303 Consider a computable function  $f(p) = x$ , where  $p$  is some input program producing output  $x$ . Let  $p \in \{0, 1\}^n$ , so  
 304 that all inputs have length  $n$ . Define the set  $A(x)$  to be the pre-image of  $x$ , i.e. the set of all the inputs that map to  
 305  $x$ , so that

$$P(x) = \frac{|A(x)|}{2^n} \quad (24)$$

306 We can describe any arbitrary input  $p$  using the following procedure: Assuming  $f$  and  $n$  are given, first enumerate  
 307 all  $2^n$  inputs and map them to outputs using  $f$ . Then describe the output  $x = f(p)$  using  $K(x|f,n)$  bits, and finally,  
 308 describe the index of the specific input  $p$  within the set  $A(x)$  using at most  $\log_2(|A(x)|)$  bits. For example, if the set  
 309 has 1024 elements, then with  $\log_2(1024) = 10$  bits, we can describe any index  $i = 1, 2, 3, \dots, 1024$ . In other words, this  
 310 procedure basically means identifying each input by first finding the  $x$  it maps to, and then finding its label within  
 311  $A(x)$ .

312 Following this procedure allows us to write the following bound for the complexity of the input  $p$ :

$$K(p|n) \leq K(x|f,n) + \log_2(|A(x)|) + \mathcal{O}(1) \quad (25)$$

313 If we choose a random input  $p$ , then with high probability (i.e. for most inputs) we will have  $K(p|n) = n + \mathcal{O}(1)$ , and  
 314 the inequality becomes

$$n \leq K(x|f,n) + \log_2(|A(x)|) + \mathcal{O}(1) \quad (26)$$

315 Rearranging yields

$$2^{-K(x|f,n)-\mathcal{O}(1)} \leq |A(x)|/2^n = P(x) \quad (27)$$

316 Combining this lower bound together with the upper bound of equation (12) shows that for a randomly chosen input  
 317 we have

$$2^{-K(x|f,n)-\mathcal{O}(1)} \leq P(x) \leq 2^{-K(x|f,n)+\mathcal{O}(1)} \quad (28)$$

318 with high probability. Note that both sides of the bound depend on uncontrolled  $\mathcal{O}(1)$  terms. They arise from similar  
 319 procedures, but are different, and we have put a minus sign on the left side of the equation to make this clear.  
 320 Nevertheless, the overall argument suggests that for  $x$  generated by randomly chosen inputs, the probability  $P(x)$   
 321 should not be too far off from our upper bound. Indeed, the direct calculations of the maps in the main paper show  
 322 that most of the probability mass is found not too far (on a log scale) from the upper bound.

323 Another way to analyse the proximity of  $P(x)$  to the upper bound is to define the function

$$q(x) = \frac{2^{-K(x|f,n)+\mathcal{O}(1)}}{P(x)} \quad (29)$$



324 which measures the ratio of the upper bound of equation (12) to the probability  $P(x)$  that an output  $x$  is generated  
 325 by random sampling of inputs.  $q(x)$  measures the relative overestimate of the probability of output  $x$  when we  
 326 approximate it by the upper bound, so we expect that in general  $q(x) \geq 1$ .

327 The expected value of  $q(x)$  summed over all inputs, which we call  $\mathcal{E}_I$ , can be written as a sum over all outputs,  
 328 where every output is weighed as  $P(x)$ :

$$\mathcal{E}_I = \frac{1}{N_I} \sum_{i=1}^{N_I} q(x(p_i)) = \sum_{i=1}^{N_O} P(x_i) q(x_i) \quad (30)$$

$$= \sum_{i=1}^{N_O} 2^{-K(x_i|f,n)+\mathcal{O}(1)} \quad (31)$$

329 For a computable map  $\sum_{x \in \mathcal{O}} P(x) = 1$ . Because  $K(x|f,n)$  is a prefix code,  $\sum_{x \in \mathcal{O}} 2^{-K(x|f,n)} \leq 1$ , but since  $q(x) \geq 1$   
 330 we know that  $\mathcal{E}_I = \sum_{x \in \mathcal{O}} 2^{-K(x|f,n)+\mathcal{O}(1)} \geq 1$  due to the  $\mathcal{O}(1)$  terms.

331 More generally, since  $\mathcal{E}_I$  is finite for a computable map, and  $q(x) \geq 0$ , we can use Markov's inequality<sup>18</sup>, which  
 332 implies, for  $q(x)$  generated by random inputs, that <sup>3</sup>:

$$\sum_{i=1}^{N_O} \{P(x_i) : q(x_i) > \mathcal{E}_I r\} < \frac{1}{r} \quad (32)$$

333 for  $r > 0$ . From this it immediately follows that:

$$\sum_{i=1}^{N_O} \left\{ P(x_i) : \frac{2^{-K(x_i|f,n)+\mathcal{O}(1)}}{\mathcal{E}_I r} \leq P(x_i) \right\} \geq 1 - \frac{1}{r} \quad (33)$$

334 In other words, on uniform random sampling of inputs, the lower bound in

$$\frac{2^{-K(x|f,n)+\mathcal{O}(1)}}{\mathcal{E}_I r} \leq P(x) \leq 2^{-K(x|f,n)+\mathcal{O}(1)} \quad (34)$$

335 holds with a probability of at least  $1 - \frac{1}{r}$ , while the upper bound, given by equation (12), always holds. Since we find  
 336 that  $P(x)$  typically varies by many orders of magnitude, we will consider the bound to be tight (on a log scale) if  
 337 it is within one or two orders of magnitude of the true  $P(x)$ . Another way of thinking about this lower bound is to  
 338 observe that  $\mathcal{E}_I$  is the input averaged ratio of the bound to the true  $P(x)$ . We measured  $\mathcal{E}_I$  explicitly for the maps  
 339 in the main text compared to our approximate upper bound and find that typically  $\log_{10} \mathcal{E}_I \approx 1$  or 2, so that, using  
 340 our definition above, the bound is relatively tight when random inputs are chosen for the maps described in the main  
 341 text.

342 We emphasise that the fact that random sampling of inputs generates  $P(x)$  close to the upper bound does not mean  
 343 that most outputs  $x$  lie close to the bound. The average probability over all  $N_O$  outputs is still  $\langle P(x) \rangle = 1/N_O$ ,  
 344 while we find for our upper bound  $2^{-K(x|f,n)+\mathcal{O}(1)} \gg 1/N_O$  for low complexity outputs, and even for the largest  
 345  $K(x|f,n)$  the upper bound  $\geq 1/N_O$ . So if the bound is tight for the outputs generated by random sampling of inputs,  
 346 then these outputs typically have  $P(x) \gg 1/N_O$ . To compensate, there must be many outputs with  $P(x) < 1/N_O$ .  
 347 Thus while sampling random inputs generates outputs that are relatively close to the bound, sampling random outputs  
 348 uniformly should give many  $P(x)$  that are typically well below the bound. Indeed, for the maps we describe in this  
 349 paper this behaviour is observed.

## 350 SUPPLEMENTARY NOTE 7

### 351 Approximations to $K(x)$

352 Kolmogorov complexity  $K(x)$  is formally uncomputable<sup>1</sup>. At best, it can be approximated from above. At first  
 353 sight these properties might seem to make it impractical to use. Nevertheless, there is a significant literature that  
 354 uses various approximations to  $K(x)$  which have been found to work remarkably well in various applications, see e.g.  
 355 references<sup>19-31</sup>

356 We follow this same approach here, and in particular use an influential complexity measure for digital strings (or  
 357 sequences) that was introduced in 1976 by Lempel and Ziv<sup>32</sup>. Their algorithm forms the foundation for many popular

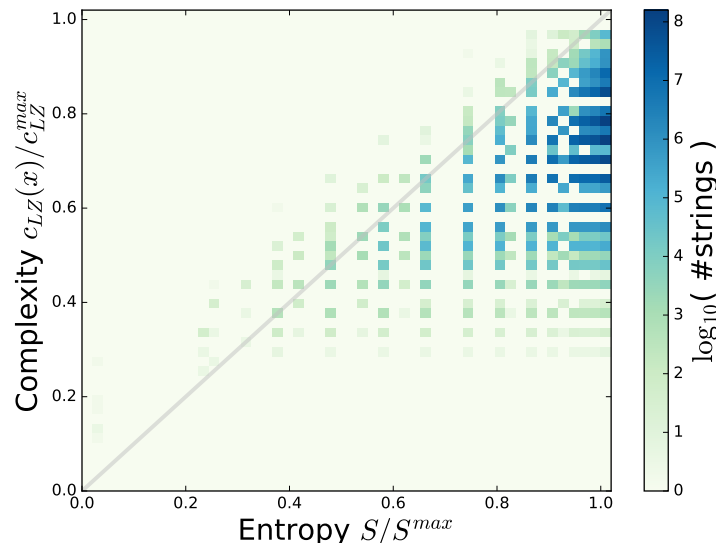

Supplementary Figure 1. Heatmap for the complexity  $C_{LZ}(x)$  versus entropy  $S(x)$  for binary strings of length  $n = 30$ . Both measures are normalised by their maximum value. Complexity is bounded by entropy, in the sense that a binary string with mostly zeros (and therefore low entropy) cannot be complex. Conversely, a string such as 010101...01 has maximum entropy, since it is made of an equal number of 0s and 1s (thus  $S/S^{max} = 1$ ), while still being very simple ( $C_{LZ}(x)/C_{LZ}^{max} \approx 0.273$ ).

compression algorithms. The essence of the Lempel-Ziv algorithm is to read through a string (of any finite alphabet size) from left to right and create a dictionary of new sub-patterns as they appear in the string. A string with many different sub-patterns would then yield a large dictionary, and hence be assigned a high complexity. Conversely, a string of little variation that is essentially built up of repeated sub-patterns would yield a small dictionary, and hence would be assigned a low complexity. If the number of words (distinct patterns) in the dictionary is  $N_w(x)$  then Lempel and Ziv showed subsequently<sup>30,33</sup> that for an ergodic source and in the limit of long sequences that

$$\lim_{n \rightarrow \infty} \frac{N_w(x) \log_2(n)}{n} = \frac{K(x)}{n} = h(x) \quad (35)$$

for nearly all sequences, where  $n = l(x)$  is the length of the binary strings, and  $h$  is the standard Shannon entropy rate. This complexity function has thus been a popular choice for approximating Kolmogorov complexity in the literature. In particular, it is thought to work better than other lossless compressions based measures for shorter strings<sup>26,34</sup>.

We use the following approximate complexity measure based on the 1976 Lempel Ziv algorithm<sup>32</sup>:

$$C_{LZ}(x) = \begin{cases} \log_2(n), & x = 0^n \text{ or } 1^n \\ \log_2(n)[N_w(x_1 \dots x_n) + N_w(x_n \dots x_1)]/2, & \text{otherwise} \end{cases} \quad (36)$$

The reason for distinguishing  $0^n$  and  $1^n$  is merely an artefact of  $N_w(x)$  which assigns complexity  $K = 1$  to the string 0 or 1, but complexity 2 to  $0^n$  or  $1^n$  for  $n \geq 2$ , whereas the Kolmogorov complexity of such a trivial string actually scales as  $\log_2(n)$ , as one only needs to encode  $n$ . In this way we ensure that our  $C_{LZ}(x)$  measure not only gives the correct behaviour for complex strings in the  $\lim_{n \rightarrow \infty}$ , as shown in equation (35), but also the correct behaviour for the simplest strings. In addition to the  $\log_2(n)$  correction, taking the mean of the complexity of the forward and reversed strings makes the measure more fine-grained, since it allows more values for the complexity of a string. Note that  $C_{LZ}(x)$  can also be used for strings of larger alphabet sizes than just 0/1 binary alphabets.

It is instructive to compare our measure  $\tilde{K}(x) = C_{LZ}(x)$  to the simple binary entropy, defined as  $S(x) = p \log p + (1-p) \log(1-p)$ , where  $p$  is the fraction of 1s (or 0s) in the string  $x$ . While low entropy strings typically have low  $\tilde{K}(x)$ , the converse is not always true. Strings that are algorithmically simple can still have high entropies, as we illustrate in Supplementary Figure 1. Nevertheless, as is well known in the literature (see also equation (35)), in the limit of long strings, the mean Kolmogorov complexity per length tends to the entropy rate.

In Supplementary Figure 2a we plot the probability distribution of complexities for a wide range of lengths  $n$ . For lengths  $n \leq 30$  we performed complete enumerations, and for longer lengths we performed sampling with  $1 \times 10^9$  samples for each length. We estimated the mean complexity, the modal complexity, and the standard deviation as a

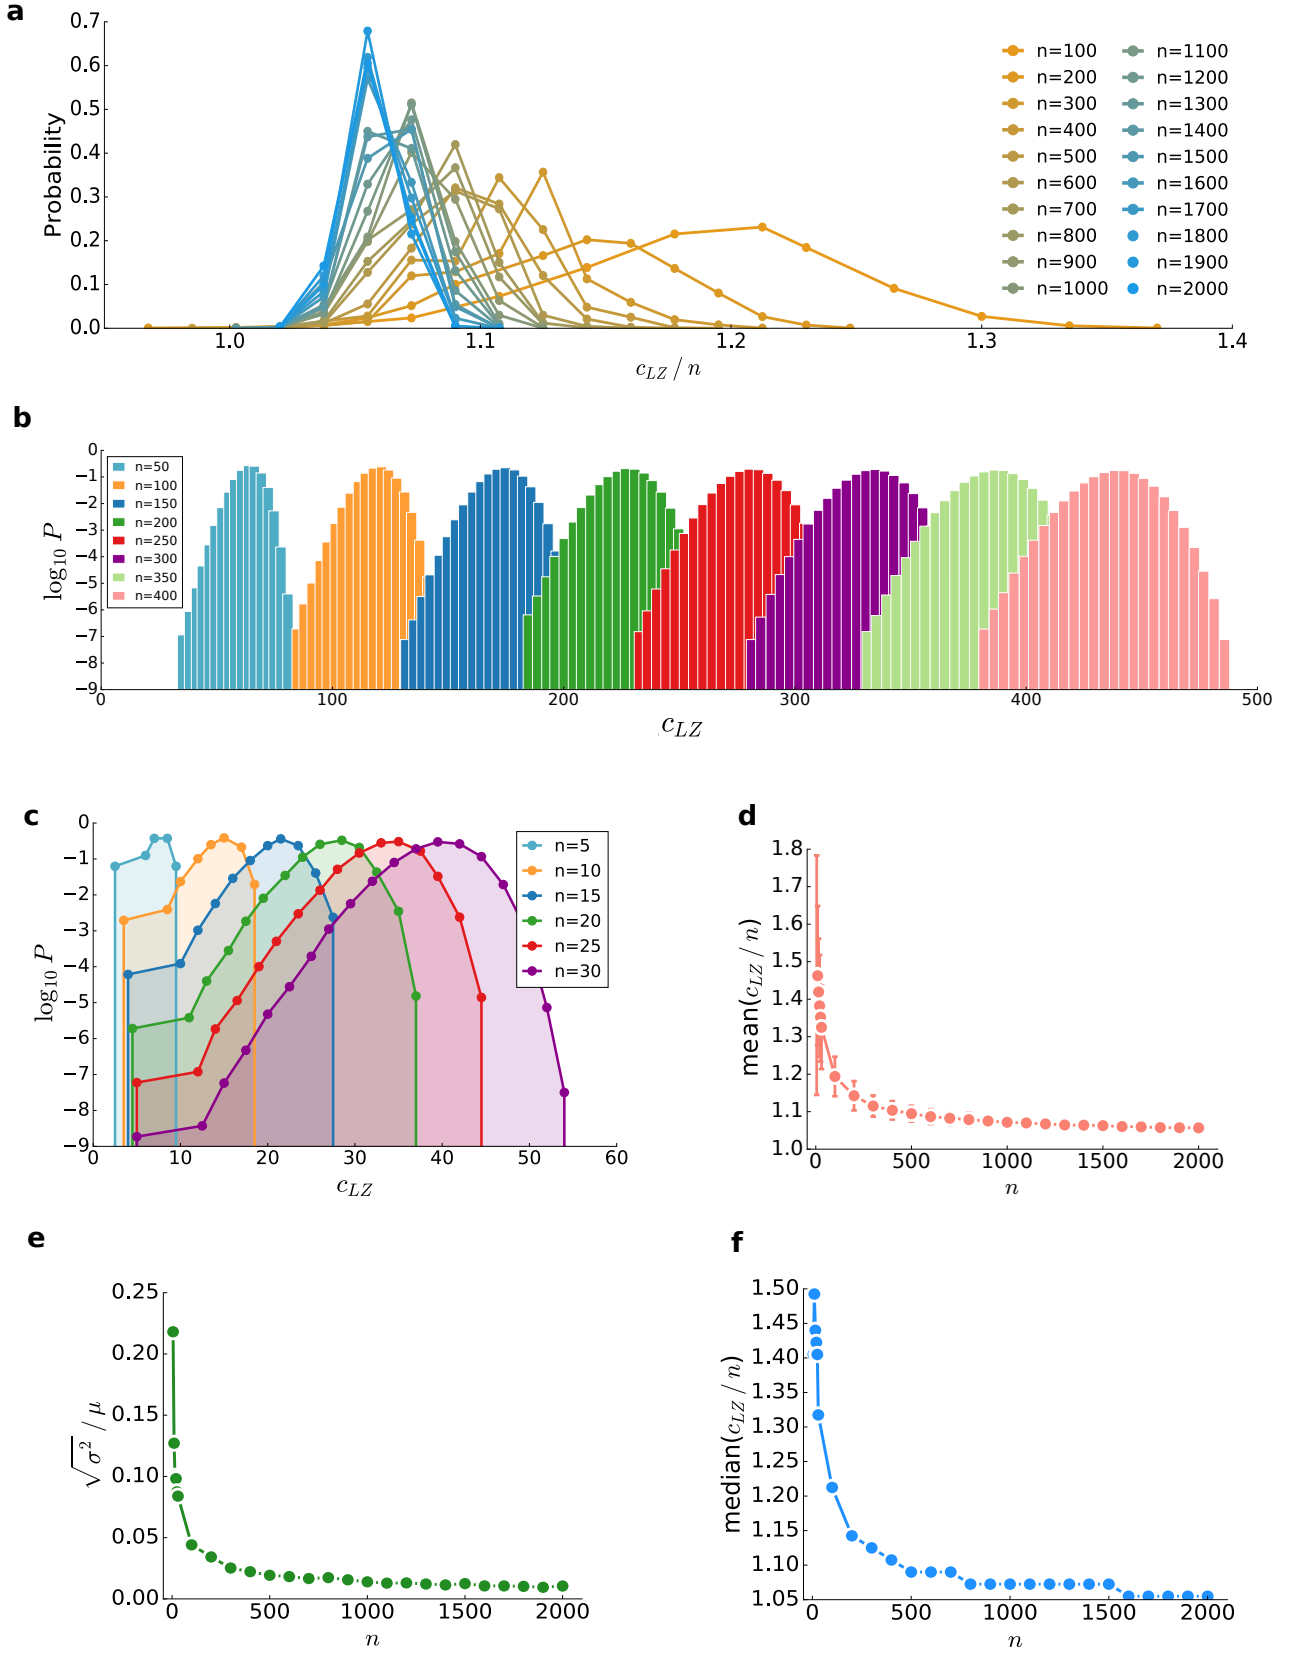

Supplementary Figure 2. **Distribution of complexity values calculated with  $C_{LZ}(x)$  for strings of different length  $n$ .** All strings of length  $n = \{5, 10, 15, 20, 25, 30\}$  were enumerated, and for  $n > 30$  samples of  $10^9$  strings were taken. **(a)** Distribution of  $C_{LZ}(x)/n$ , for  $n = 100$  to 2000. **(b)** Distribution of  $C_{LZ}(x)$ , for  $n = 50$  to 400. **(c)** Distribution of  $C_{LZ}(x)$ , for  $n = 5$  to 30. **(d)** Mean of  $(C_{LZ}(x)/n)$ , for  $n = 5$  to 400. Error bars represent one standard deviation. **(e)** Standard deviation  $\sigma$  over the mean  $\mu$  of  $C_{LZ}(x)$ , for  $n = 5$  to 400. **(f)** Median of  $(C_{LZ}(x)/n)$ , for  $n = 5$  to 400. Note that as  $n$  grows, the mean and median  $C_{LZ}/n$  approach 1, and the standard deviation  $\sigma$  over the mean  $\mu$  drops: In other words, the distribution becomes more peaked. Lines connecting data points were added to guide the eye.

function of the length  $n$ . Also, we show in Supplementary Figure 2e that as the length of the strings get longer, the distributions get relatively narrower. The mean is expected to approach  $n \rightarrow \infty$  limit  $\langle C_{LZ} \rangle \approx n^{30,33}$ . The main thing to note is that for a given  $n$ , strings with complexity well below the mean are rare, and progressively more rare for lower complexities.

Any estimator of Kolmogorov complexity will have weaknesses. And there are some subtleties that should be kept in mind when interpreting  $C_{LZ}(x)$ . Firstly, rather than most strings having the maximum complexity, we find that the majority of strings are close to the mode which is in turn very near the mean complexity (See Supplementary Figure 2c,d,e). For Lempel-Ziv it is known that strings with maximal complexity are somewhat anomalous because they can be created by an algorithmic process<sup>35</sup>, which is an artefact of the Lempel-Ziv algorithm itself, and so they are in fact not the most complex in a Kolmogorov sense. However, as can be seen in Supplementary Figure 2 these highest complexity strings remain rare, and so for our purposes they do not play a big role.

We also applied two alternate complexity measures to  $C_{LZ}(x)$ . Firstly, in Supplementary Figure 3 we apply the **Compress** function in *Mathematica* to RNA secondary structures of  $n = 55$  and  $n = 80$  bases. As can be seen, the values of the complexity approximation  $\tilde{K}(x)$  are different, so that the values of  $a$  and  $b$ , estimated using the methods described in Supplementary Note 8, are different, as expected. Nevertheless, the same basic simplicity bias phenomenology obtains, as we would predict. Note that **Compress** is similar to **zlib** compression, which is based on another of Lempel and Ziv's famous compression algorithms, often called LZ77<sup>36</sup>.

Given that most lossless compression algorithms are influenced by the ideas of Lempel and Ziv, it is not straightforward to find measures that are truly different in origin. Recently, however, a fundamentally different way of estimating the Kolmogorov complexity of strings has been derived in an important series of papers<sup>37–39</sup> that apply the full AIT coding theorem by sampling over many Turing machines. In principle this coding theorem method (CTM) is very powerful, and in particular can go well beyond lossless compression techniques, which are fundamentally sophisticated entropy measures. However, CTM is limited to very short strings ( $\lesssim 12$  bits). To calculate the complexity for longer strings, one can use the Block Decomposition Method (BDM) which, as the name suggests, breaks such strings into smaller blocks, whose complexity can be approximated by the value taken from the CTM<sup>39,40</sup>. As shown in Supplementary Figure 3, we again obtain the basic simplicity bias phenomenon. In this BDM case we simply fit to both  $a$  and  $b$ , rather than using the methods described in Supplementary Note 8. The reason is that some of the simplifying assumptions used in Supplementary Note 8 do not work for the BDM method. For example, we assume that  $a$  can be approximated by assuming  $b$  to be zero, but that does not work here, most likely because there is a larger additive constant to the BDM complexity than to the  $C_{LZ}(x)$ . However, as argued in Supplementary Note 8, additive and multiplicative changes can all be absorbed into  $a$  and  $b$ . In principle, once one has fit  $a$  and  $b$  for a given complexity measure, which only needs a small number of outputs, then equation (37) can be used for other outputs of the same map.

Finally, the coding theorem results which we invoke apply to the prefix-free version of Kolmogorov complexity, denoted  $K(x)$ , as opposed to the plain Kolmogorov complexity, denoted  $C(x)$ , see 1. However, while these two measures have important theoretical differences, they are asymptotically equal by equation (4), and so quantitatively close. Since we approximate  $K(x)$  anyway, we ignore the subtle distinction between these measures in our approximations. Some of the differences may be absorbed into our parameters  $a$  and  $b$ , discussed in the next section.

## SUPPLEMENTARY NOTE 8

### Predicting $a$ and $b$ for computable maps

A key result in the main text is equation (3), which approximates the upper bound (12) for limited complexity maps as

$$P(x) \leq 2^{-a\tilde{K}(x)-b} \quad (37)$$

In this section, we describe how to make predictions for the values of  $a$  and  $b$  by using minimal information about the maps.

#### Estimating $a$

To derive an approximation for the slope  $a$  we start with equation (23) which provides lower and upper bounds on the probability bound. If we assume that the minimum upper bound is reached by the most complex objects, i.e. outputs such that our approximation to the Kolmogorov complexity,  $\tilde{K}(x)$ , takes the value  $\max_{x \in O} \tilde{K}(x)$ , and

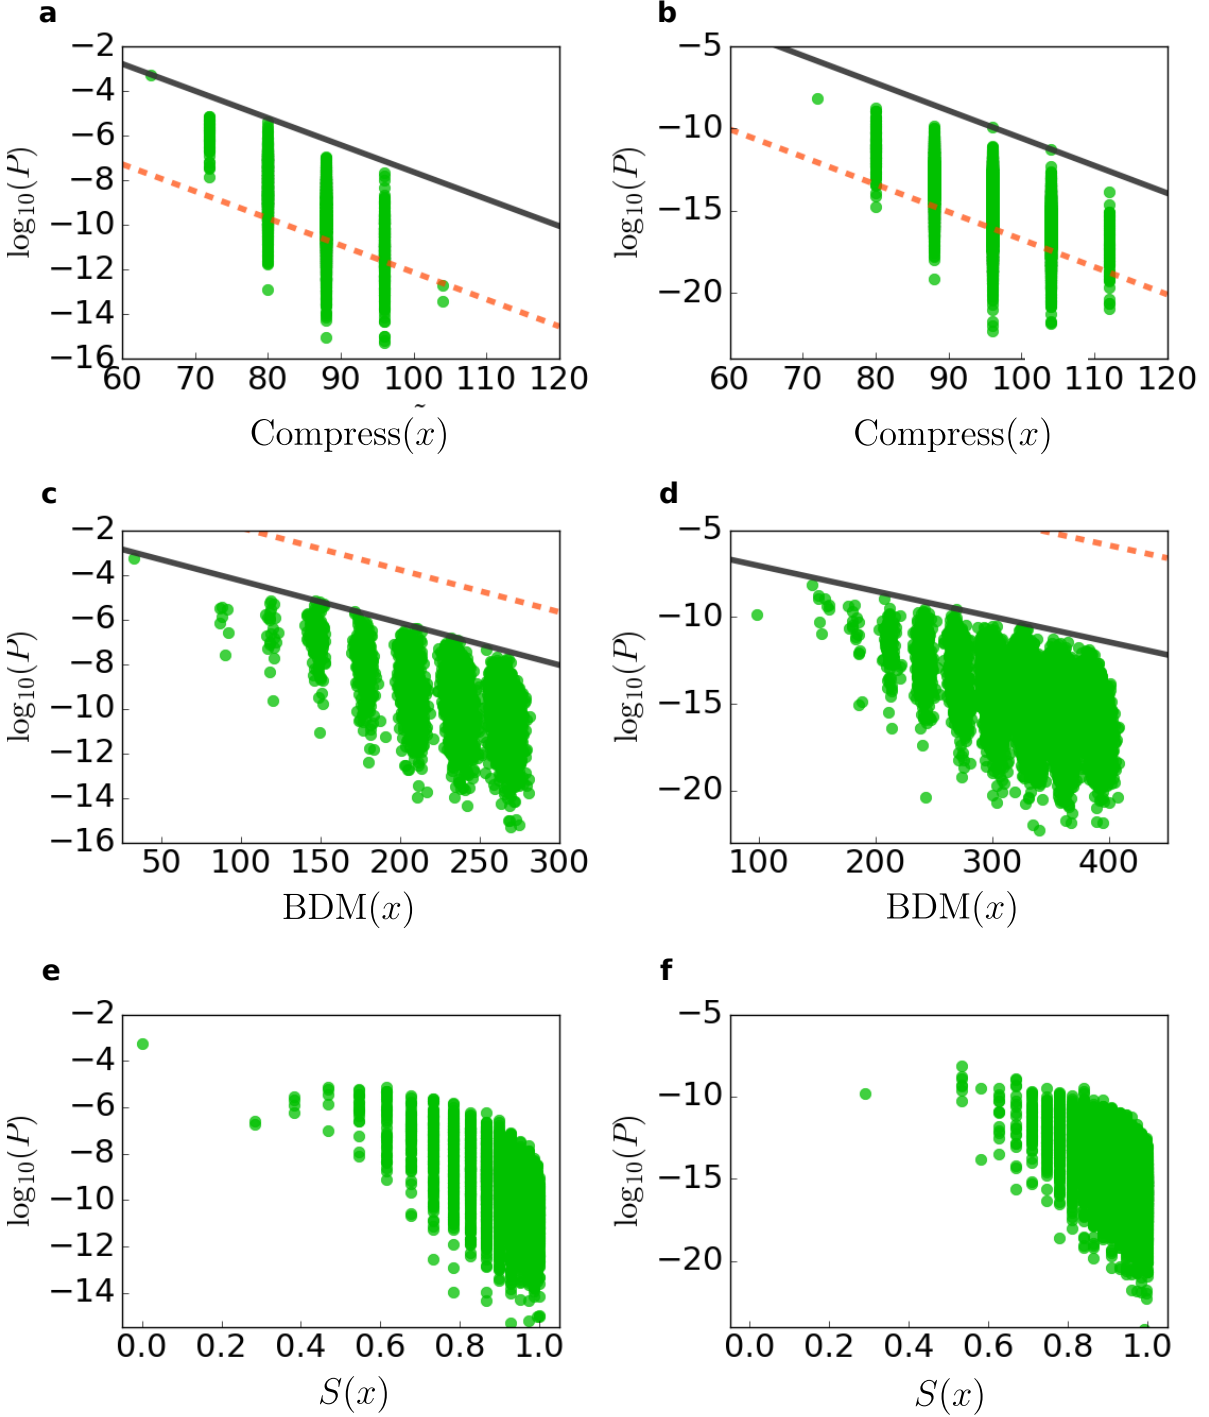

Supplementary Figure 3. **Simplicity bias predicted by other approximations to Kolmogorov complexity.** We use, *Mathematica*'s `Compress` function, the block decomposition method (BDM) and the simple entropy  $S(x)$  of the dot-bracket notation, for  $n = 55$  and  $n = 80$  RNA secondary structures. In order, the plots show (a) `Compress` for  $n = 55$  RNA, (b) `Compress` for  $n = 80$  RNA, (c) BDM for  $n = 55$  RNA, (d) BDM for  $n = 80$  RNA, (e) Entropy  $S(x)$  for  $n = 55$  RNA, (f) Entropy  $S(x)$  for  $n = 80$  RNA. The solid lines denote our estimated upper bound, the dashed lines are the upper bound with  $b = 0$ . For the `Compress` and BDM method, we observe a similar simplicity bias phenomenology to what was observed in Figure 1a of the main paper, where  $C_{LZ}$  was used. For the entropy measure, there is also a decay of the probability with increasing complexity, but the behaviour of the upper part of the curves are significantly less linear than for `Compress`, BDM and  $C_{LZ}(x)$ .

431 further that  $b$  can be ignored for this derivation which we motivate below, then  $a$  has a simple approximation, shown  
 432 as equation (4) in the main text:

$$a \approx \frac{\log_2(N_O)}{\max_{x \in O}(\tilde{K}(x))} \quad (38)$$

433 Using this equation we can either find the gradient  $a$  from knowing  $N_O$ , or find  $N_O$  from knowing  $a$ . Alternatively,  
 434 if we have a way of estimating  $\max(\tilde{K}(x))$ , as well as the gradient  $a$ , then we can infer  $N_O$  directly. Since  $N_O$  is very  
 435 hard to estimate for large maps where exhaustive enumerations are not possible, this method may be a way to get a  
 436 quick estimate of  $N_O$  based on some limited sampling.

### 437 Estimating $b$

438 As a first approximation, we note that if a map is strongly biased towards simple outputs, then we expect the largest  
 439  $P(x)$  for outputs  $x$  with complexity for  $\tilde{K}(x) = \min_x(\tilde{K}(x))$  to be at most within one or two orders of magnitude of 1.  
 440 That suggests that  $b$  is generally small, and as a zeroth order approximation we assume that  $b \approx 0$ .

441 Alternatively, if  $P(x)$  is known for some output  $x$ , then assuming knowledge of  $a$  and  $\tilde{K}(x)$ , and assuming

$$P(x) \approx 2^{-a\tilde{K}(x)-b} \quad (39)$$

442 then  $b$  can be inferred by rearranging this equation. Clearly this method would work just as well for finding  $a$ , if one  
 443 knew  $b$  and  $\tilde{K}(x)$ . It seems plausible that the most likely  $P(x)$  to be close to the upper bound is the largest  $P(x)$   
 444 for the set of  $x$  with modal  $\tilde{K}(x)$ , i.e. the  $\tilde{K}(x)$  that is most likely to be generated by sampling random inputs. We  
 445 typically use this value of  $P(x)$  to fix  $b$ . One drawback with this method is that it relies on the assumption of the  
 446 approximate equality equation (39); hence if for the chosen output  $x$ , the upper bound was only a poor approximation,  
 447 then the corresponding estimation of  $b$  would be equally poor.

448 With the methods above, reasonable approximations to  $a$  and  $b$  can generally be estimated with a limited amount  
 449 of sampling of random inputs, as we demonstrate in the main text. As long as there are ways to estimate  $\max(\tilde{K}(x))$ ,  
 450 and  $N_O$ , then the only real fitting parameter is  $b$ , which to first order can simply be set to zero. Of course some  
 451 simplifying assumptions have been used here. Not all maps may obey them, but we can always simply fix  $a$  and  $b$   
 452 with a few values of  $P(x)$  and  $\tilde{K}(x)$ . It remains the case that only a small amount of information is needed to fix the  
 453 bound.

454 Finally, we note that the values of  $a$  and  $b$  depend on the chosen approximate measure of complexity. In this  
 455 paper we use  $\tilde{K}(x) \approx K(x) = C_{LZ}(x)$ . If we were to choose a different complexity say  $\tilde{K}_{\alpha,\beta} = \alpha C_{LZ}(x) + \beta$ , then  
 456 the phenomenology would be the same, but with new constants  $a_{\alpha,\beta} = a/\alpha$  and  $b_{\alpha,\beta} = b - a\beta/\alpha$ . In other words,  
 457 multiplicative and additive constants are simply absorbed into the parameters. Such robustness is a useful property.

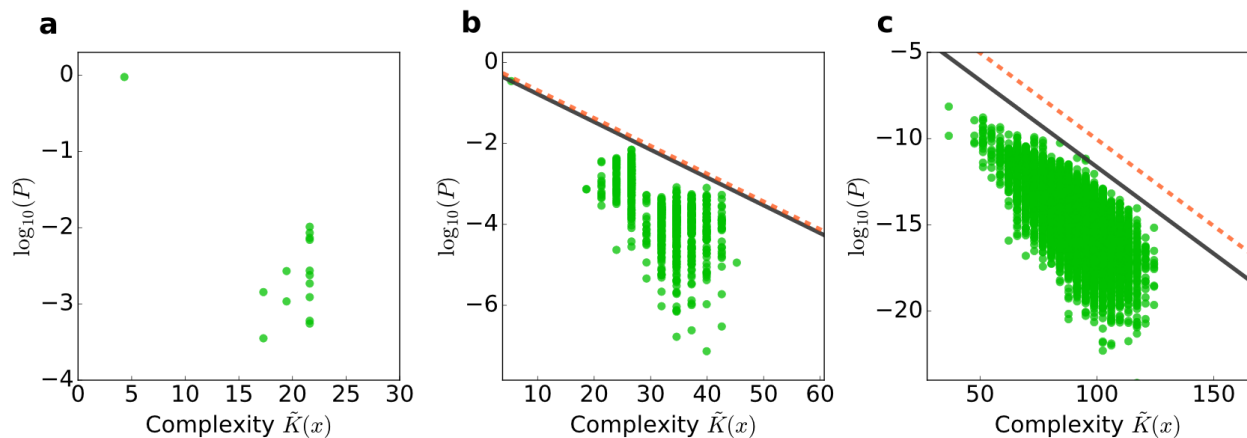

Supplementary Figure 4. **Probability  $P(x)$  vs. increasing complexity for different sized systems.** (a) RNA  $n = 10$  shows essentially no simplicity bias, although the trivial unbonded and simplest structure does have the largest probability. (b) RNA  $n = 20$  shows simplicity bias, despite the noise. For the upper bound,  $a = 0.23$ ,  $b = 1.08$ ; (c) RNA  $n = 80$  shows clear simplicity bias, as does  $n = 55$  in the Main text. For the upper bound,  $a = 0.33$ ,  $b = 6.39$ .

## SUPPLEMENTARY NOTE 9

## Simplicity bias and system size

460 In the main text we argue that one needs  $N_O \gg 1$  to avoid finite size effects when measuring the simplicity bias  
 461 of an input-output map. Here we illustrate this point, showing finite-size effects in the RNA map. Supplementary  
 462 Figures 4a, b and c respectively show  $\log P(x)$  vs.  $K(x)$  plots for  $n = 10, 20$  and  $80$  RNA sequences, supplementing  
 463 the plot for  $n = 55$  map in the main text. The plots for the shortest sequences show behaviour that deviates from  
 464 the upper bound simplicity bias prediction: Supplementary Figure 4a with  $n = 10$  RNA shows no simplicity bias,  
 465 except for the trivial structure of no bonds which is simplest and highest in probability, Supplementary Figure 4b  
 466 with  $n = 20$  shows simplicity bias, but with some noise. In contrast, Supplementary Figures 4c for  $n = 80$  and Figure  
 467 1(a) from the main text ( $n = 55$ ) show pronounced simplicity bias for a range of values for  $\tilde{K}(x)$ . Thus as  $N_O$  grows,  
 468 simplicity bias becomes clearer.

469 For the shorter systems, full enumerations are possible, but since the space grows as  $N_I = 4^n$ , this is not possible  
 470 for longer systems. For example, for  $n = 55$ , there are  $4^{55} \approx 10^{33}$  different structures and an estimated  $10^{13}$  different  
 471 secondary structure outputs<sup>41</sup>. As it can be seen in Supplementary Figure 5, we only sample a small fraction of the  
 472 total number of outputs, and these are typically those with higher  $P(x)$ .

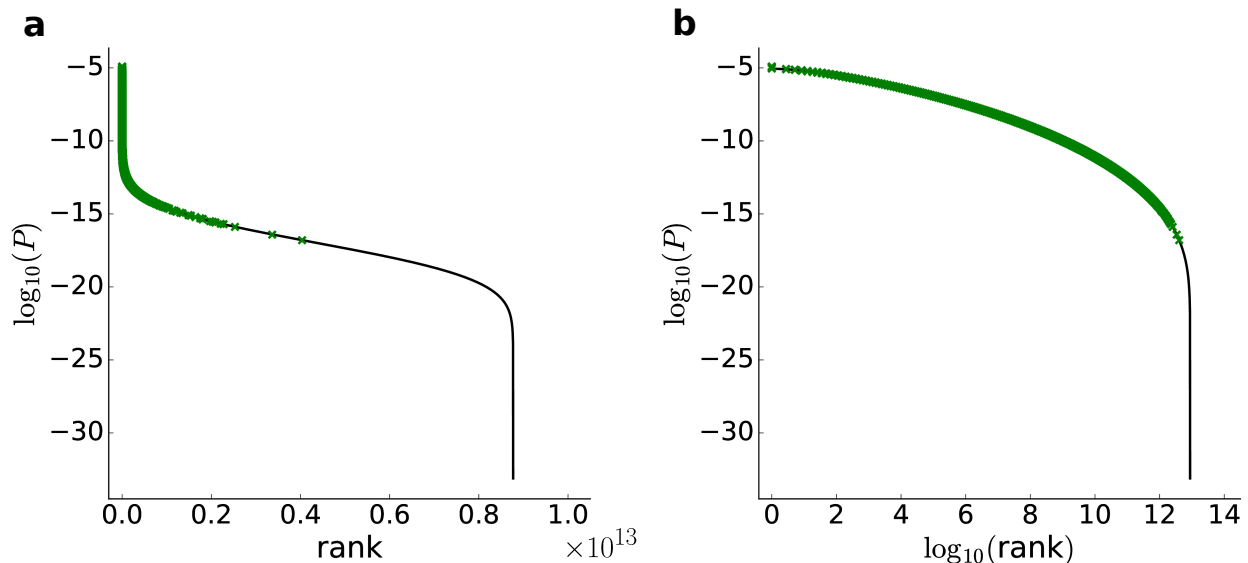

Supplementary Figure 5. Probability  $P(x)$  that a phenotype is obtained by random sampling over inputs versus its rank for RNA secondary structures, in (a) linear and (b) logarithmic scale. In black, we show the analytic approximation for the probability distribution derived in ref. 41. In green, the probability of sampled RNA structures of length  $n = 55$  shown in Figure 1a in the main text. Note that structures of low probability are not found by sampling.

## SUPPLEMENTARY NOTE 10

## Predicting which of two outputs has higher probability

475 The arguments above suggest that if outputs  $x$  and  $y$  are generated from random sampling of inputs, so that the  
 476 outputs are expected to be close to their upper bounds, and if  $\tilde{K}(x) < \tilde{K}(y)$  holds,  $P(x) > P(y)$  should also hold  
 477 in most cases. We tested this claim for all input-output maps in the Figure 1 in the main paper by sampling  $10^4$   
 478 pairs of outputs  $(x, y)$ , and counting a prediction as ‘correct’ if the claim holds or if  $\tilde{K}(x) = \tilde{K}(y)$  and  $P(x)$  is within  
 479 a factor of 10 of  $P(y)$ . Naturally, the null hypothesis would be no bias towards simple outputs therefore we should  
 480 obtain  $P(x) > P(y)$  for 50% of the samples. We performed output-sampling, i.e. weighing every output equally,  
 481 and input-sampling, i.e. weighing every output by its probability. Here is the percentage of correct results for each  
 482 input-output map from Figure 1 in the main, including the complex matrix map, for which this method does not

work, since it does not show simplicity bias:

- RNA: input-sampled 99%, output-sampled 78%
- Circadian rhythm: input-sampled 81%, output-sampled 71%
- Ornstein-Uhlenbeck financial model: input-sampled 92%, output-sampled 75%
- L-systems: input-sampled 87%, output-sampled 68%
- Simple matrix map: input-sampled 89%, output-sampled 71%
- Complex matrix map: input-sampled 49%, output-sampled 52%

For the simple matrix map, we ignored the highest probability output (a trivial vector) since this takes up the majority of the space and so skews the  $P(x)$  v.s.  $P(y)$  results. But overall, we see that just using  $K(x)$  and  $K(y)$  can give a good first guess of whether  $P(x)$  is larger or smaller than  $P(y)$ . Of course, the larger the difference  $K(x) - K(y)$ , the more confidence we can have in the difference between  $P(x)$  and  $P(y)$ .

## SUPPLEMENTARY NOTE 11

### Low complexity, low probability outputs have lower complexity inputs

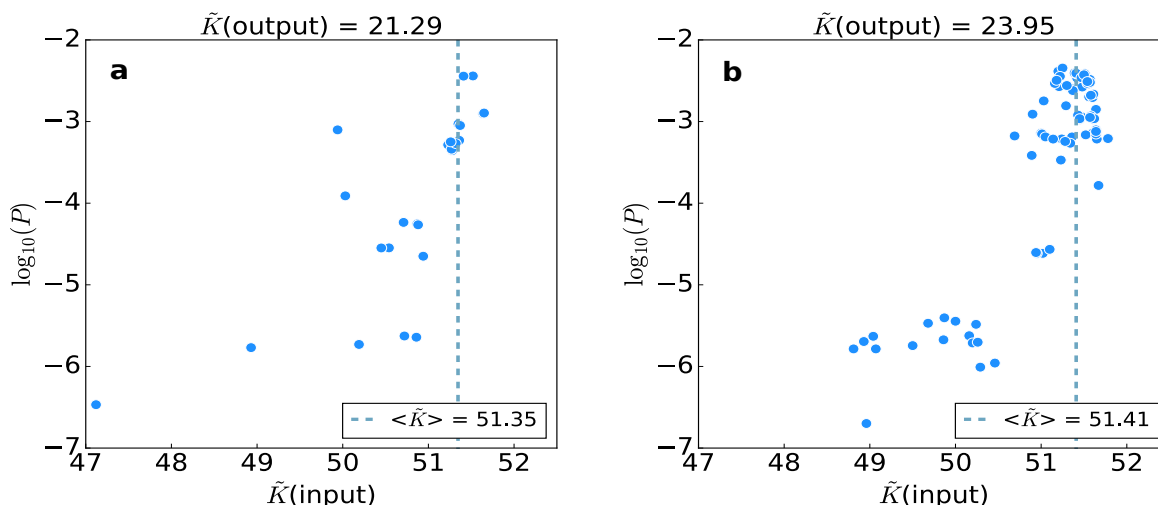

Supplementary Figure 6. The probability  $P(x)$  to obtain a given RNA structure  $x$  upon random sampling of inputs as a function of the mean complexity of the input sequences that produce  $x$  for  $n = 20$  RNA, shown for (a)  $\tilde{K}(x) = 21.29$  and (b)  $\tilde{K}(x) = 23.95$ . These are among the lowest complexity values, as seen in Supplementary Figure 4b. As predicted by equation (25), secondary structure outputs with a lower  $P(x)$  (further from the bound) have a lower than average sequence complexity.

There is another implication from the upper bound on the complexity of an input, described in equation (25): if both  $K(x|f, n)$  and  $P(x) = |A(x)|/2^n$  are small, then this equation will be violated unless the l.h.s. is also small. In other words, this argument also predicts that low complexity outputs with low probability should be generated by inputs for which  $K(p|n) < n$ , i.e. inputs that are simpler than what we obtain by random sampling inputs. Small  $K(x|f, n)$  suggests a larger upper bound on  $P(x)$ , so the outputs with simpler input sets are those for which  $P(x)$  is far from the upper bound of equation (12).

To illustrate this effect we take the RNA map as an example. We measure the complexity  $K_I$  of an RNA input string by replacing each of the 4 nucleotide letters with 00, 01, 10, or 11, and then measure the complexity of the corresponding binary sequence. We then sampled 50 million RNA sequences with  $n = 20$  nucleotides, and measured the mean complexity of the inputs associated to each output. For randomly chosen  $n = 10$  RNA input strings we



506 find an average complexity of  $K_I = 51.2$ . However, as can be seen in Supplementary Figure 6, low  $K(x)$  low  $P(x)$   
 507 outputs, i.e. ones are far from the upper bound of Equation (12), have an average sequence complexity  $K_I < 51.2$ ,  
 508 whereas those outputs that are closer to the upper bound, have the expected average complexity close  $K_I = 51.2$ , the  
 509 average for randomly chosen RNA  $n = 20$  input strings. Since, as discussed above, low complexity strings are rare,  
 510 the number of inputs mapping to low  $K(x)$  low  $P(x)$  outputs must be a small fraction of all input strings. This in  
 511 turn implies that random inputs (which are overwhelmingly complex) must mainly map to outputs where  $P(x)$  is not  
 512 too far from the bound.

513 The validation of this non-trivial prediction from equation (25) helps justify our arguments above for the other  
 514 conclusion that follow from this equation, namely that randomly sampled inputs are likely to generate outputs  $x$  with  
 515 probabilities  $P(x)$  nearer the upper bound of Equation. (12).

## 516 SUPPLEMENTARY NOTE 12

### 517 Simplicity bias in other input-output maps

518 In this section we provide some more examples of input-output maps, and elaborate further on some maps discussed  
 519 in the main text.

#### 520 The circadian rhythm model

521 In the main paper we study a well known model by Vilar et al.<sup>42</sup> for the circadian rhythm of eukaryotes as an  
 522 input-output map. The model consists of a set of nine equations:

$$\begin{aligned}
 dD_A/dt &= \theta_A D'_A - \gamma_A D_A A \\
 dD_R/dt &= \theta_R D'_R - \gamma_R D_R A \\
 dD'_A/dt &= \gamma_A D_A A - \theta_A D'_A \\
 dD'_R/dt &= \gamma_R D_R A - \theta_R D'_R \\
 dM_A/dt &= \alpha'_A D'_A + \alpha_A D_A - \delta_{M_A} M_A \\
 dA/dt &= \beta_A M_A + \theta_A D'_A + \theta_R D'_R \\
 &\quad - A(\gamma_A D_A + \gamma_R D_R + \gamma_C R + \delta_A) \\
 dM_R/dt &= \alpha'_R D'_R + \alpha_R D_R - \delta_{M_R} M_R \\
 dR/dt &= \beta_R M_R - \gamma_C A R + \delta_A C - \delta_R R \\
 dC/dt &= \gamma_C A R - \delta_A C
 \end{aligned} \tag{40}$$

523 Since we are mainly using this model to illustrate a generic ODE map, we will not give a complete description of  
 524 what all the parameters mean. For a full account we point to the original paper<sup>42</sup>. Very briefly, the model above  
 525 aims to study the ability of circadian clocks to maintain a constant period even in noisy conditions, and describes the  
 526 interaction of two genes that regulate the expression of a pair of proteins, the activator  $A$  and the repressor  $R$ . This  
 527 repressor works by sequestering the activator, forming the inactivated complex  $C$ , whose concentration over time is  
 528 the variable we chose to use as output, taking its rate of formation (i.e. its slope) at discrete time steps to produce  
 529 our binary string. Since this variable is placed at the bottom of the regulatory cascade, it is a natural choice for  
 530 the output. Supplementary Figure 7 represents the output of the ODE model, showing the concentration of the nine  
 531 molecules over time, for the set of parameters given in the original paper<sup>42</sup>:  $D_A$  and  $D_R$  start at 1 molecule, meaning  
 532 one single copy of the activator and repressor genes, and other variables start at zero, with  $\alpha_A = 50 \text{ h}^{-1}$ ,  $\alpha'_A = 500$   
 533  $\text{h}^{-1}$ ,  $\alpha_R = 0.01 \text{ h}^{-1}$ ,  $\alpha'_R = 50 \text{ h}^{-1}$ ,  $\beta_A = 50 \text{ h}^{-1}$ ,  $\beta_R = 5 \text{ h}^{-1}$ ,  $\delta_{M_A} = 10 \text{ h}^{-1}$ ,  $\delta_{M_R} = 0.5 \text{ h}^{-1}$ ,  $\delta_A = 1 \text{ h}^{-1}$ ,  $\delta_R = 0.2$   
 534  $\text{h}^{-1}$ ,  $\gamma_A = 1 \text{ molecule}^{-1} \text{ h}^{-1}$ ,  $\gamma_R = 1 \text{ molecule}^{-1} \text{ h}^{-1}$ ,  $\gamma_C = 2 \text{ molecule}^{-1} \text{ h}^{-1}$ ,  $\theta_A = 50 \text{ h}^{-1}$ , and  $\theta_R = 100 \text{ h}^{-1}$ .

535 Since in this input-output map the inputs are given as continuous parameters, it is less clear how to sample inputs  
 536 than in cases such as RNA where the inputs are discrete strings. Here, instead, every input parameter corresponds to  
 537 a biological constant or rate, and the realistic ranges for such parameters are often unknown. Moreover, the value of  
 538 each parameter – allosteric constants, affinity rates – is also the product of a series of other very complex input-output  
 539 maps, transducing information from DNA sequences into amino acid sequence and eventually into a parameter in this  
 540 ODE model. To make progress, and since we are simply treating this as a model map, we set all 15 parameters to

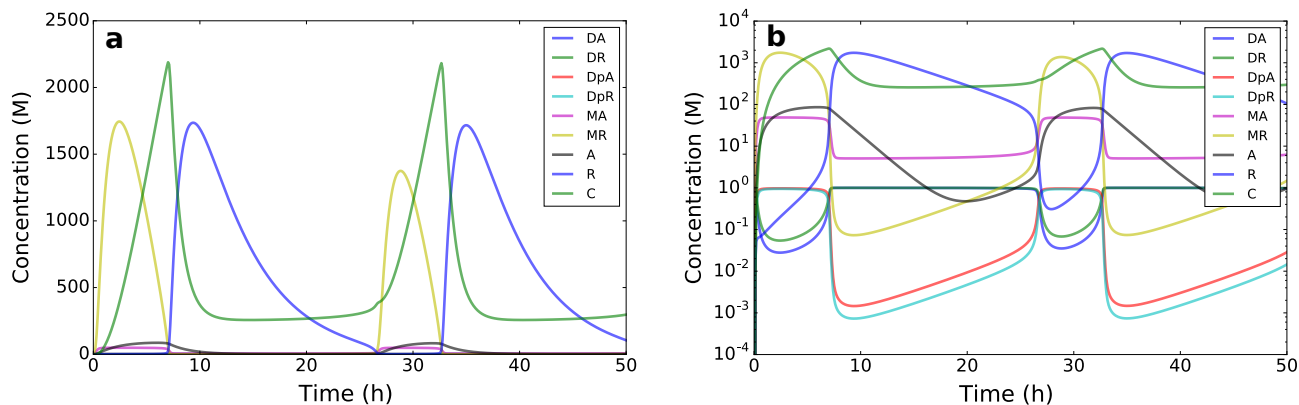

Supplementary Figure 7. The output of the ODE model described in equation (41), showing the concentration of 9 molecules from equation (40) over time, in linear scale (a) and logscale (b). The initial conditions and parameters are the same as in the original paper<sup>42</sup>.

541 their original values, multiplied by a random factor in  $\{0.25, 0.50, \dots, 1.75, 2.00\}$  chosen with uniform probability. In  
 542 this way we effectively have a discrete set of input parameters.

543 Since the outputs depend continuously on the input variables, in principle every input would produce a unique  
 544 output. Nevertheless, intuitively, many outputs can be very similar to one another. To capture this, we coarse-grain  
 545 the outputs by discretising them into binary strings using the “up-down” method<sup>43,44</sup>. We take the output curve  $y(t)$   
 546 calculated in an interval  $t \in [0, T]$ , calculate its slope  $dy/dt$  at intervals of  $t = \delta t, 2\delta t, 3\delta t, \dots$ , and print the sign of  
 547  $dy/dt$  in every interval: for  $j = 1, \dots, T/\delta t$ , if  $dy/dt \geq 0$  (or  $< 0$ ) at  $t = j\delta t$ , the  $j$ -th bit of the output string gets  
 548 assigned a 1 (or a 0). The resulting string represents the oscillations of  $y(t)$ : curves with more oscillations will produce  
 549 more complex strings, while curves with fewer oscillations will produce strings with longer repeated sequences of 0s  
 550 and 1s.

551

#### *Alternative sampling of inputs*

552 To check that our discretisation method does not affect the main effects we observe, we also take the same range of  
 553 parameters, but now randomly sample uniformly on the whole range for each one, e.g. not just or discrete values. In  
 554 Supplementary Figure 8a we used this method to randomly sample  $10^6$  inputs and used the same method as above to  
 555 calculate the complexities of the outputs. As can be seen, the same simplicity bias behaviour obtains as can be seen  
 556 in Figure 1b of the main paper. The values of  $a$  and  $b$  for the two sampling methods agree more or less within the  
 557 uncertainty of our methods for obtaining them.

558

#### *Discretising initial conditions*

559 Since the behaviour described by the circadian rhythm model should depend on the initial conditions of the ODE  
 560 system, it is important to test whether the simplicity bias we observe also depends on that. We took a sample of  
 561  $10^6$  combinations of different values for parameters and initial conditions, produced their corresponding outputs and  
 562 derived the upper bound coefficients  $a = 0.32$  and  $b = 1.39$  according to equation (38). The plot in Supplementary  
 563 Figure 8b shows the expected simplicity bias phenomenology: there is a very biased distribution in the probability  
 564 that correlates with complexity.

565

#### *Alternative sample sizes*

566 To generate Figure 1b for the ODE in the main paper, we took a sample of  $10^6$  inputs, which is less than total  
 567  $8^{15} \approx 3 \times 10^{13}$  inputs for this coarse-grained ODE model. Consequently, any estimate of  $P(x)$  for outputs for which  
 568  $P(x) \lesssim 10^{-6}$  will be subject to large errors. Importantly, however, as can be seen in Supplementary Figure 9, even  
 569 with as few as  $10^3$  samples, an upper bound can be identified which has a slope very close to the one found with much  
 570 more sampling. We note that for the very small sample sizes, using the estimated  $N_O$  needed in equation (38) does

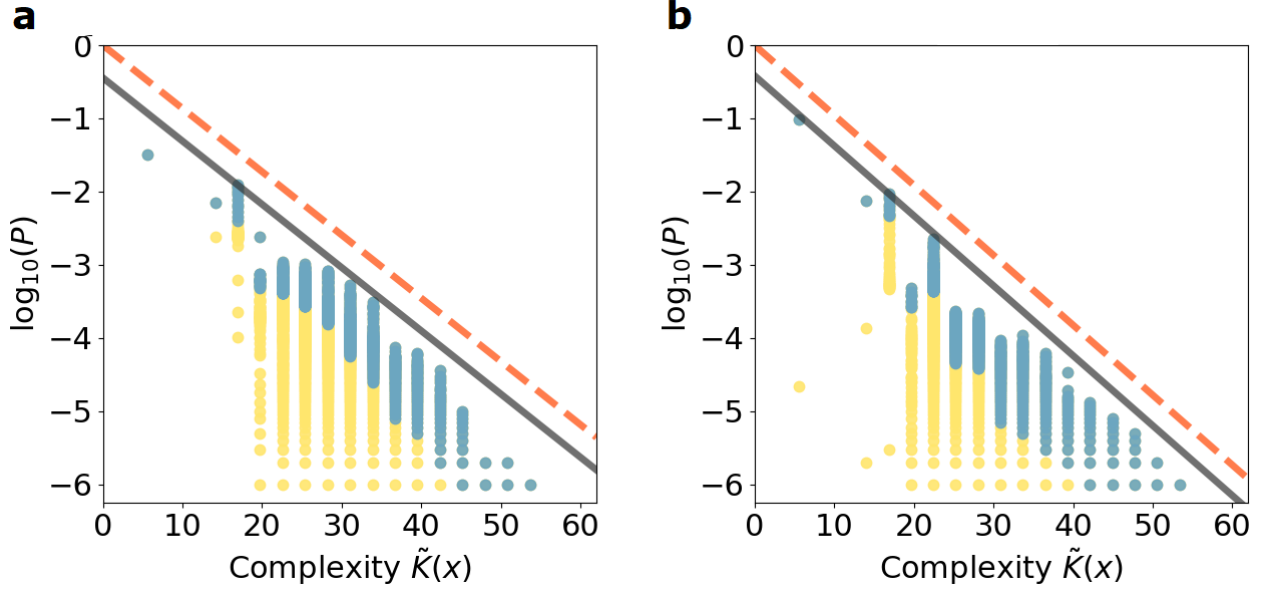

Supplementary Figure 8. (a) Probability versus complexity for the outputs of a circadian rhythm model with  $10^6$  inputs sampled uniformly from a continuous range, instead of sampled from discretised values over the same range. The upper bound coefficients  $a = 0.29$  and  $b = 1.48$  are derived according to equation (38) (b) Probability versus complexity for the outputs of a circadian rhythm model with  $10^6$  combinations of inputs and initial conditions, sampled from a discretised range. The upper bound coefficients  $a = 0.32$  and  $b = 1.39$  are derived according to equation (38). For both plots, outputs were discretised in 50 bins, and the results are very close to Figure 1b in the main text. For every value of  $\tilde{K}$ , the blue dots represent the outputs corresponding to 50% of the inputs that produce outputs with  $\tilde{K}(x) = \tilde{K}$ .

571 not work very well, but for the larger samples this works better and a consistent result is obtained. Nevertheless, we  
 572 see that limited sampling is enough to identify the slope by fitting, and without needing equation (38). Hence the  
 573 upper bound slope can be estimated without a full enumeration of the inputs, but with only partial sampling.

574

### Cell cycle

575 Another input-output map we explore here is based on the well known the model of ref. 45, which describes part of  
 576 the cell cycle for budding yeast. This well-established model is made of a large system of approximately 50 differential  
 577 equations, where the values of more than 130 input parameters define the outputs, which are concentration-time  
 578 curves for different chemicals. As an output we chose the concentration-time curve of the cell division cycle protein  
 579 6, or Cdc6. Our choice was motivated only by the observation that the Cdc6 curve varies sufficiently to yield many  
 580 different outputs of varying complexity. To coarse-grain the outputs, we discretise the output curves to binary strings  
 581 following the ‘up-down’ method<sup>43,44</sup> described above, yielding a binary string of length 40.

582 As inputs for this map also consist in real parameters of an ODE system, we take an approach akin to what we  
 583 did for the circadian rhythm, and similar to what is done by the authors of this model in a robustness analysis<sup>45</sup>. We  
 584 set all parameters to default values, and then sample by allowing each parameter to be scaled by a random factor  
 585  $\sqrt{2}^\zeta$ , where  $\zeta$  is an integer  $\{-4, 4\}$ , chosen with uniform probability. We then sampled  $10^6$  input parameter sets and  
 586 produced the outputs shown in Supplementary Figure 10. As for the previous input-output maps, this one also shows  
 587 clear simplicity bias.

588

### Ornstein-Uhlenbeck financial model

589 In the main text we discuss an input-output map describing the pattern of price fluctuations modelled by the  
 590 Ornstein-Uhlenbeck process. This process is described by the equation  $dS_t = \theta(\mu - S_t)dt + \sigma dW_t$ , where  $S_t$  is the  
 591 price,  $\mu$  and  $\sigma$  are parameters representing the historical average price and the market volatility respectively,  $\theta$  is the  
 592 noise dissipation rate, and  $W_t$  is a Brownian motion representing market noise. This Brownian motion is also the  
 593 input of the map. These inputs then generate  $S_t$ , and the outputs  $x_t$  are defined also as sequences over  $n$  time steps,

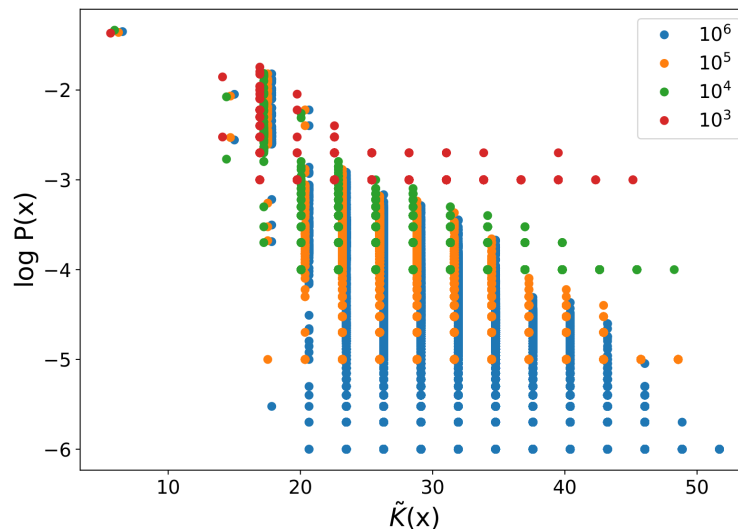

Supplementary Figure 9. Probability versus complexity for the outputs of a circadian rhythm model with  $10^3$  to  $10^6$  inputs, and outputs discretised in 50 bins. Note that for clarity, every sample size is displaced horizontally from the previous one by 0.3 for clarity. For sampling  $10^n$  times the lowest possible probability is  $10^{-n}$ , which explains the long  $K(x)$  range at the minimum probability for each number of outputs. These are outputs that only appear once in the sample, and so the probability estimate is inaccurate. As the size of the input sample grows, the estimate of the probability of the rare outputs becomes more accurate. On the other hand, the  $P(x)$  close to the upper bound do not change as much, and nor does the estimated values of  $a$  and  $b$  for the upper bound.

594 where  $x_j = 0$  if  $S_j \leq 0$ , and  $x_j = 1$  otherwise. The output sequence  $x$  can be interpreted as indicating whether  $S_t$  is  
 595 above or below its historical average, and thus whether the trader would profit by selling or buying more of it.

596 In the main paper, we show that this input-output map shows simplicity bias phenomenology. In this section, we  
 597 confirm that this bias towards simplicity we observe is not an artefact of our choice of parameters: Supplementary  
 598 Figure 11 shows that different values of the parameters  $\theta$  and  $\sigma$  still produce bias towards simple behaviour.

599 Note that the Brownian motion in this model could be coarse grained as a random walk of fixed step sizes, which  
 600 in turn can be defined by a sequence of  $\pm 1$  steps. Both processes become equivalent when  $\theta = 0$  in the Ornstein-  
 601 Uhlenbeck process, causing the noise term  $\sigma dW_t$  to dominate. From this perspective, we could also define the inputs  
 602 in this model as the collection of all  $\pm 1$  sequences of some specified length, depending on the level or coarse graining.  
 603 Because of that, this input-output map is also related to the random walk return map below, which describes a map  
 604 from a one-dimensional random walk with fixed step size to a binary string output, where the  $j$ -th bit represents  
 605 whether on step  $j$  the random walking particle is to the right ( $s_j > 0$ ) or to the left ( $s_j \leq 0$ ) of the origin  $s_0 = 0$ .

606

### Random walk return map

607 In this section we study a simple one-dimensional random walk starting at  $s_0 = 0$ , followed by a series of uncorrelated  
 608 steps of 1 or  $-1$  as an input-output map.

609 *Inputs* are defined as follows: A walk of  $m$  steps will produce a position vector  $s = (s_1, s_2, \dots, s_m)$ , where  $s_j$   
 610 represents the position of the random walker at time  $j$ . Since each sequence of steps is equally likely, and will produce  
 611 a unique path, we consider this path as an input.

612 *Outputs* are defined as another sequence over  $m$  time steps,  $x = (x_1, x_2, \dots, x_m)$ , where  $x_j = 0$  if  $s_j \leq 0$ , and  
 613  $x_j = 1$  otherwise. The changes from 0 to 1 (and vice-versa) in the output sequence thus correspond to times when the  
 614 random walker returns to  $s = 0$ . We measure the complexity of these binary output strings in the usual way using  
 615  $C_{LZ}(x)$ .

616 One way of seeing this map is as a simplification of the Ornstein-Uhlenbeck model map, when the mean-reverting  
 617 parameter  $\theta$  is set to zero. In this regime, all change in the price  $S_t$  will be due to the Brownian motion  $dW_t$ , which  
 618 allows for steps of any size. In this section, this motion is coarse-grained to a random walk with steps of fixed size.  
 619 This allows the inputs to be fully enumerated, since the number of possible random walks with a given number of  
 620 steps becomes countable and finite.

621 The probability versus complexity relationship is shown in Supplementary Figure 12a for all  $2^{22}$  random walks of

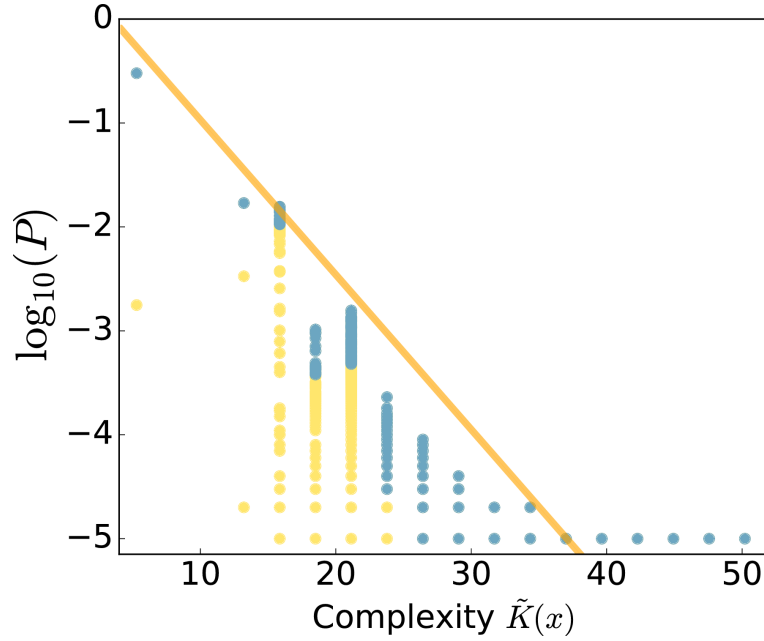

Supplementary Figure 10. The ODE cell cycle model of ref. 45, treated as an input-output map, shows simplicity bias.  $10^6$  inputs were randomly sampled and the output curves for the Cdc6 curve were discretised with the ‘up-down’ method over 40 bins. For every value of  $\tilde{K}$ , the blue dots represent the outputs corresponding to 50% of the inputs that produce outputs with  $\tilde{K}(x) = \tilde{K}$ . Since the number of outputs is too small to provide a good estimate of  $N_O$ , the upper bound line was fit to the distribution.

622  $m = 22$  steps. The random walk return map shows the now familiar bias towards simple outputs. Since we computed  
 623 the full list of outputs by enumerating all inputs of  $m = 22$  steps, we were able to calculate  $\max(\tilde{K})$  and  $N_O$  directly,  
 624 and find  $a$  via equation (38). It is interesting to compare the probability versus entropy plot as well, which can be  
 625 seen in Supplementary Figure 12b. Here the entropy measure shows a decay which is much less pronounced than the  
 626  $C_{LZ}(x)$  decay.

627 Given the simplicity of a random walk, this decay of the probability with complexity can also be motivated directly  
 628 without needing AIT arguments. Since the random walk has no memory, every time the walker returns to  $s = 0$  it  
 629 can be seen as starting a new walk. In other words, the probability of any return to  $s = 0$  can be represented as the  
 630 product of multiple ‘first return’ walks. It is known<sup>46</sup> that the probability of first return  $T$  of a simple random walk  
 631 at step  $m$  scales for large  $m$  as:

$$P_{ret}(T = m) = \frac{1}{m-1} \binom{m}{\frac{m}{2}} 2^{-m} \approx \frac{1}{m-1} \frac{1}{\sqrt{\pi m/2}} \sim m^{-1.5} \quad (41)$$

632 where  $m$  must be an even number. Most importantly, this means that for a given number of steps, high probability  
 633 outputs will be strings which have long sequences of zeros or ones, since  $P(T = m)$  goes to zero relatively slowly as  
 634  $m$  increases. Similarly, the probability of a simple random walker not returning after  $m$  steps is given by<sup>46</sup>:

$$P(S_1 \neq 0, S_2 \neq 0, \dots, S_m \neq 0) = 2 \sum_{b=1}^m \frac{b}{m} P(S_m = b) \quad (42)$$

635 where the 2 takes into account walks in  $s > 0$  and  $s < 0$ , and  $P(S_m = b) = \binom{m}{\frac{m+b}{2}} 2^{-m}$ . Equation (41) implies  
 636 that outputs made of simple repeated motifs will have very low probability. For instance, a run of length 6 that  
 637 returns three times to the origin has a probability of  $P_{ret}(T = 2)P_{ret}(T = 2)P_{ret}(T = 2) \approx (2^{-1})^3 \approx 12.5\%$ , while  
 638 equation (42) implies that a run of same length that does not return to 0 has a probability of 64.4%. More generally,  
 639 the largest probability strings are typically ones with no or few returns, while strings with multiple returns will have  
 640 low probability.

641 We give some examples of outputs and probabilities from the numerical simulations, enumerating all  $2^{22}$  bitstrings.  
 642 An example of the highest probability output for each unique complexity value, with format (string complexity,  $\log_{10}$   
 643 probability, output string) is

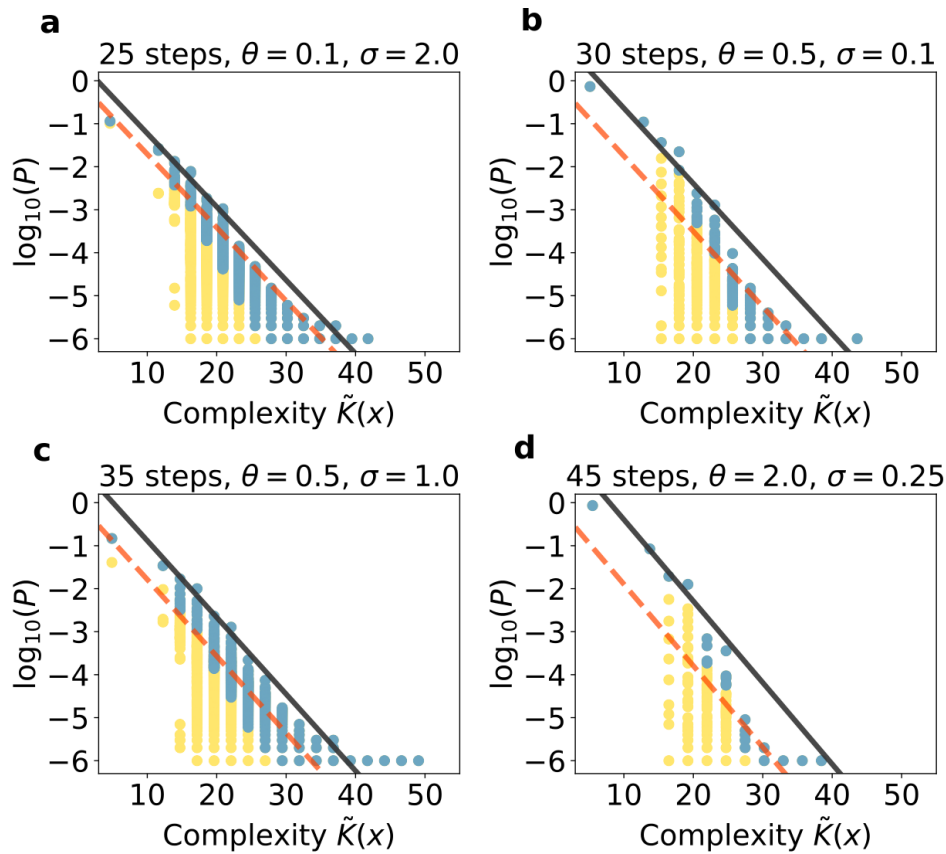

Supplementary Figure 11. The Ornstein-Uhlenbeck process shows simplicity bias for different choices of the parameters  $\theta$  and  $\sigma$ , as well as of the number of steps of the Brownian motion. Respectively: **(a)**  $\mu = 0.1$ ,  $\sigma = 2.0$ , 25 steps,  $a=0.56$ ,  $b=-1.6$ , **(b)**  $\mu = 0.5$ ,  $\sigma = 0.1$ , 30 steps,  $a=0.58$ ,  $b=-3.7$ , **(c)**  $\mu = 0.5$ ,  $\sigma = 0.10$ , 35 steps,  $a=0.59$ ,  $b=-3.0$ , **(d)**  $\mu = 2.0$ ,  $\sigma = 0.25$ , 45 steps,  $a=0.63$ ,  $b=-5.0$ . For every value of  $\tilde{K}$ , the blue dots represent the outputs corresponding to 50% of the inputs that produce outputs with  $\tilde{K}(x) = \tilde{K}$ . Since  $N_O = 2^n$ ,  $\max(\tilde{K}(x))$  is also known, and the upper bound coefficients were calculated using equation (38). Red dashed lines represent an upper bound offset of  $b = 0$ .

```

644 4.0, -1.08, '111111111111111111111111'
645 11.0, -2.40, '1111111111111111111111110'
646 13.0, -1.66, '110000000000000000000000'
647 16.0, -1.66, '10111111111111111111111111'
648 18.0, -2.24, '001100000000000000000000'
649 20.0, -2.24, '0100111111111111111111111'
650 22.0, -2.81, '010011000000000000000000'
651 25.0, -3.39, '0011010011111111111111111'
652 27.0, -3.82, '101111111011000000000000'
653 29.0, -4.22, '010011111011000000000000'
654 31.0, -4.78, '010000011010011111111111'
655 33.0, -5.32, '01000001110110011111111'
656 36.0, -5.84, '0100110010111110110000'
657 38.0, -5.92, '010000001001110101101'
658 40.0, -6.62, '1011101011110000110010'

```

659 As expected from our back-of-the-envelope calculation for return probabilities, higher probability outputs contain  
660 long runs of zeros or ones. Further calculations in this vein could undoubtedly provide more detail on the distribution  
661 of outputs. The point of this random walk illustration, however, is to demonstrate that our very simple AIT based  
662 predictions capture some of the main phenomenology without the need for detailed calculations.

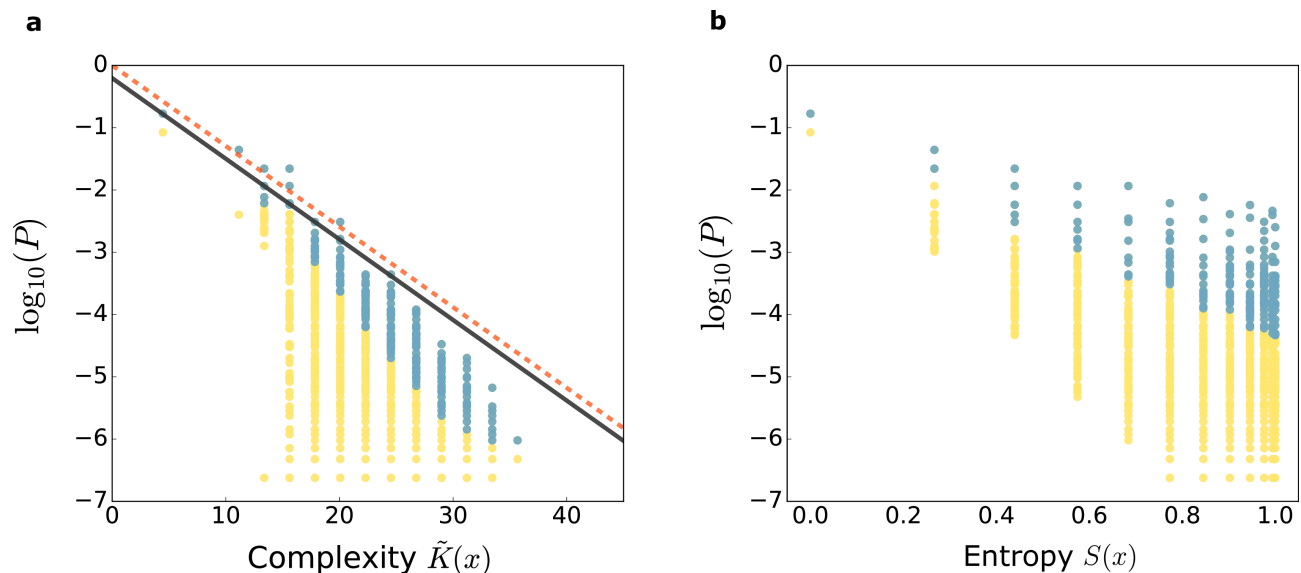

Supplementary Figure 12. Decay in probability  $P(x)$  with increasing (a) complexity and (b) entropy for the random walk return map. In (a), the values of  $a = 0.43$  and  $b = 0.68$  were estimated using the methods in Supplementary Note 8. In (b), while there is a decrease in probability with increasing entropy, the upper bound for  $P(x)$  does not vary in orders of magnitude as it does for  $\tilde{K}(x) = C_{LZ}(x)$ . For every value of  $\tilde{K}$ , the blue dots represent the outputs corresponding to 50% of the inputs that produce outputs with  $\tilde{K}(x) = \tilde{K}$ .

663

### Polynomial curves

664 In this section, we study a particularly simple map. Inputs are the coefficients  $\alpha_i$  of a polynomial  $y(t) = \sum_{i=0}^n \alpha_i t^i$   
 665 and outputs are the resulting curve over the variable  $t$ . We show that this input-output map also exhibits bias towards  
 666 simple outputs. As with the ODE systems above, this input-output map goes from the continuous space of all  $n$ -tuples  
 667 of real coefficients, i.e.  $\mathbb{R}^n$ , to the also continuous space of all polynomial curves  $y(t)$ . Consequently the inputs cannot  
 668 be fully enumerated, and every output curve is unique. It is therefore necessary to coarse-grain both the input and  
 669 output spaces.

670 The space of possible polynomials is extremely large. To simplify, we take the coefficients  $\alpha_i$  from a normal  
 671 distribution of mean zero and variance one. Polynomials of this form are also known as Kac polynomials<sup>47</sup>. It is  
 672 known that the expected number of real roots for a Kac polynomial of degree  $n$  is proportional to  $\log n$ <sup>48</sup>, but the  
 673 actual distribution of the number of zeros does not have a known closed formula. One advantage of Kac polynomials  
 674 is that they have symmetry properties that lead to some simplifications: Since the distribution of coefficients  $\alpha_i$  is  
 675 symmetric around zero, for every positive root there should be a negative root, which means that the negative real  
 676 roots should be distributed in the same way as their positive counterparts. Second, for every polynomial  $p(x)$  with  
 677 coefficients  $(a_0, a_1, \dots, a_{n-1}, a_n)$  there will be a polynomial  $\tilde{p}(x)$  with the same coefficients, but in the reverse order:  
 678  $(a_n, a_{n-1}, \dots, a_1, a_0)$ . For every  $x \neq 0$  which is a root of  $p(x)$ , the reverse polynomial  $\tilde{p}(x)$  will have a root at  $1/x$ .  
 679 Due to this property, we only need to evaluate  $y(t)$  in  $[0, 1]$ , since for every root in this interval there will be a root  
 680 in  $[1, \infty)$ , in addition to their negative mirror images. In summary, because of these symmetries, the outputs can be  
 681 considered in  $[0, 1]$  only.

682 We coarse-grain the outputs in two ways. In the first one, we used the ‘up-down’ method described above, thus  
 683 converting every output into a binary output which we here call *string 1*. And since the ‘up-down’ method produces  
 684 a string that captures the changes in sign of the derivative of  $y(t)$ , i.e. the roots of its derivative, we also produced a  
 685 binary string simply describing the location of the roots of  $y(t)$ . *string 2* is made entirely of 0s, except for the digits  
 686 representing the intervals where  $y(t)$  crosses zero, which are 1s. For example, if  $y(t)$  crosses zero three times in three  
 687 different discrete bins, then its corresponding output string will then have three 1s, while if  $y(t)$  does not cross zero  
 688 it will correspond to a string made only of 0s.

689 One problem that remains is that since we don’t know the exact distribution of roots in advance, there could be  
 690 multiple roots in a single bin when roots are closer than the distance between bins. This is hard to completely rule out.  
 691 Instead, since the goal in this section is to simply demonstrate the existence of simplicity bias in this input-output  
 692 map, we simply check for the severity of this problem by varying the number of bins in the discretisation, showing

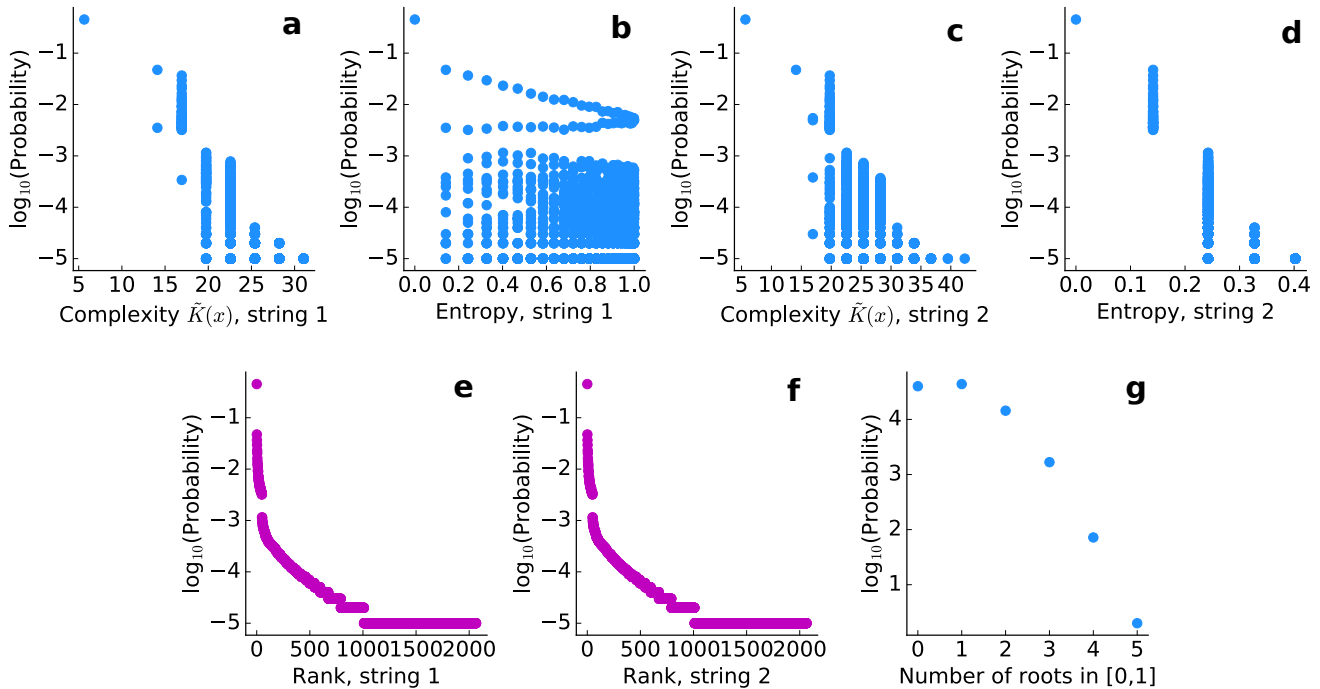

Supplementary Figure 13. Simplicity bias in a simple polynomial input-output map. (a) and (b) respectively show output probability versus output complexity, and output probability versus output entropy, for outputs defined as *string 1*, which indicates changes of sign of the slope. Similarly, (c) and (d) show probability versus complexity and probability versus entropy, for outputs defined as *string 2*, which indicates the coarse-grained location of the roots of a given polynomial. (e) and (f) show the probability of all output strings 1 and 2 respectively, from most probable to least probable output. Note that despite *string 1* and *string 2* being defined differently, both present the same decay in (e) and (f). Finally, (g) shows the distribution of the number of roots in the  $[0, 1]$  interval. Polynomials of degree 10 were used for all figures, and the  $[0, 1]$  interval was divided in 50 bins ( $t, t + \delta t$ ), where  $\delta t = 0.02$ .

693 that the simplicity bias phenomenology is present for different bin sizes.

694 To proceed we take input coefficients from a standard normal distribution. The resulting polynomials are evaluated  
 695 only in  $[0, 1]$  and then discretised into binary strings using the methods above. We sampled  $10^5$  polynomials of degree  
 696  $d = 10$ , discretising their outputs into 50 bit-long strings, and comparing the complexity  $\hat{K}(x)$  and the entropy  $S(x)$   
 697 of an output to the number of inputs corresponding to each output, i.e. the probability of that output. Despite being  
 698 very simple and coarse-grained, this input-output map shows the basic simplicity bias phenomenology we predicted  
 699 above. As seen in Supplementary Figures 13a and 13c, random sampling of inputs (coefficients) is much more likely  
 700 to produce low complexity curves than more complex curves.

701 Supplementary Figure 13 also shows other proxies for output complexity. For example, Supplementary Figure 13b  
 702 compares the probability of output *string 1* with its entropy  $S(x)$ . In sharp contrast to the complexity  $\hat{K}(x)$ , there  
 703 is no clear relationship between the probability and the  $S(x)$ . The reason for this is not hard to work out. Entropy  
 704 is maximal for an equal number of one's and zero's, and minimal when either one or zero dominates. Thus simple  
 705 patterns like 010101010101010101 or 11111111110000000000 have low complexity when measured by  $C_{LZ}(x)$  but  
 706 maximal entropy. For *string 1* many outputs of varying entropy will correspond to similar polynomial curves. For  
 707 example, if the derivative of a polynomial has a single root in  $[0, 1]$ , the proportion of 0s and 1s in *string 1* will depend  
 708 on where the root is located, since *string 1* indicates where  $y(t)$  is increasing or decreasing. This leads to nearly  
 709 identical outputs – curves with a single extremum – having very different values for entropy. On the other hand, as  
 710 can be seen in Supplementary Figures 13c and 13d for *string 2* both measures of complexity show a clear correlation.  
 711 In this case, the complexity  $\hat{K}(x)$  and the entropy  $S(x)$  of the output string, are essentially proxies for the number of  
 712 roots in  $[0, 1]$ , which drops quickly with increasing number of roots, as shown in Supplementary Figure 13g.

713 Both output definitions, *string 1* and *string 2*, give rise to the same distribution of probability per output, shown  
 714 by the rank plot in Supplementary Figures 13e and 13f. Supplementary Figure 13g shows the distribution of the  
 715 number of roots in  $[0, 1]$ ,

716 This bias towards simple outputs is observed for polynomials of varying degree, with varying levels of discretisation.



717 In Supplementary Figures 14 and 15 we show that our results are robust to different levels of discretisation of the  
 718 outputs, as well as to different polynomial degrees. For such a simple system it is possible to rationalise this bias in  
 719 other ways as well, but the point of this exercise is to show that a simple application of our simplicity bias arguments  
 720 seems to capture some of the dominant aspects of the bias.

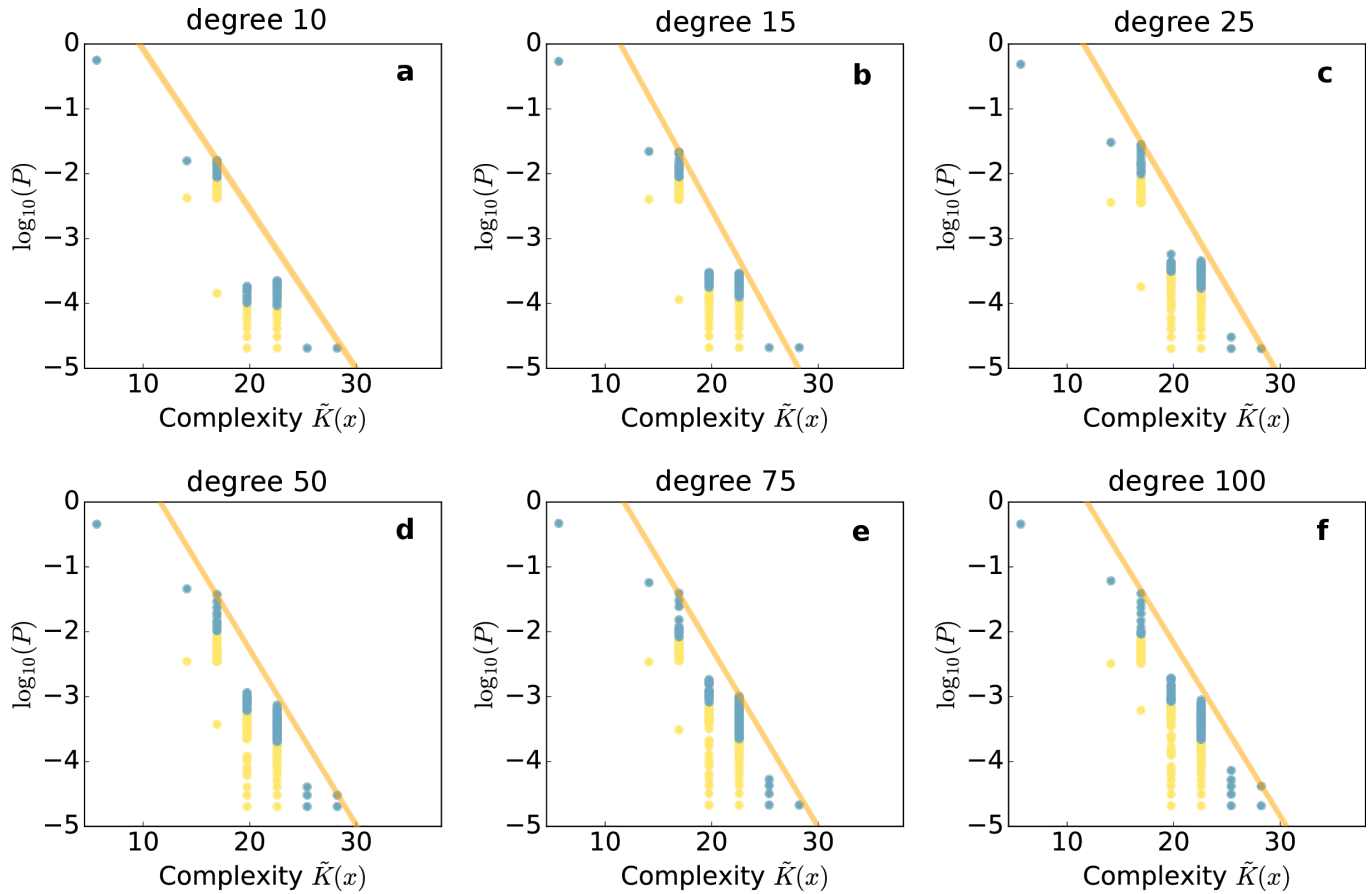

Supplementary Figure 14. Graphs showing probability versus complexity of an output string, for polynomials of varying degrees and fixed discretisation (50 bins). Panels (a) to (f) represent polynomials of degree 10, 15, 25, 50, 75 and 100 respectively. Each plot was produced from a sample of  $10^5$  polynomials. For every value of  $\tilde{K}$ , the blue dots represent the outputs corresponding to 50% of the inputs that produce outputs with  $\tilde{K}(x) = \tilde{K}$ . Since the number of outputs is too small to provide a good estimate of  $N_O$ , the upper bound line was fit to the distributions.

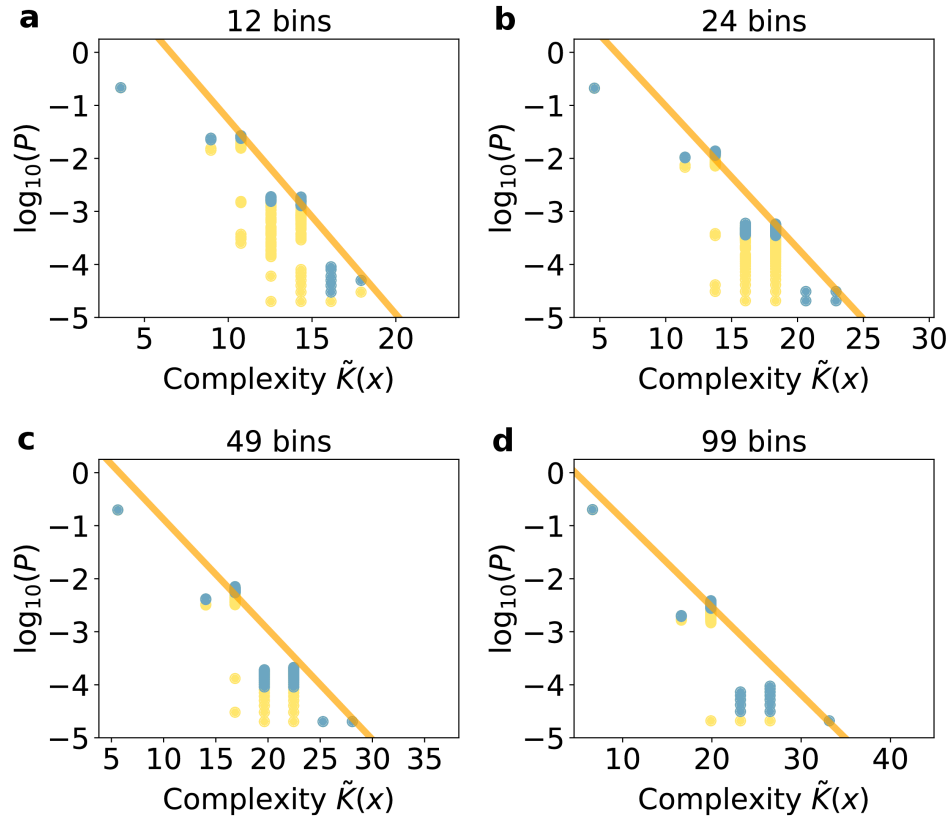

Supplementary Figure 15. Graphs showing probability versus complexity of an output string, for polynomials of varying discretisation and fixed degree ( $d = 14$ ). Panels (a) to (d) represent polynomials discretised in 12, 24, 49 and 99 bins respectively. Each plot was produced from a sample of  $10^5$  polynomials, and for every value of  $\tilde{K}$ , the blue dots represent the outputs corresponding to 50% of the inputs that produce outputs with  $\tilde{K}(x) = \tilde{K}$ . Since the number of outputs is too small to provide a good estimate of  $N_O$ , the upper bound line was fit to the distributions.

721

### The matrix map: how map complexity affects simplicity bias

722 In the main text we discussed a matrix map illustrated in Supplementary Figure 16. Here the inputs are binary  
 723 vectors  $p$  of length  $n$  and the outputs are binary vectors  $x$  of length  $n$ . The outputs are produced by first performing  
 724 a simple matrix multiplication  $z = M \cdot p$ , where  $M$  is an  $n \times n$  matrix, and then applying a thresholding function  
 725 such that each element  $z_i$  is transformed to the outputs vector  $x$  such that the output is 0 if  $z_i < 0$  and 1 if  $z_i \geq 0$ .

726 The reason for the threshold function is to ensure the nonlinearity of this input-output map. A linear map, such  
 727 as  $z = M \cdot p$ , is incapable of producing bias towards any output, since it is simply an injective function from  $\mathbb{R}^n$  into  
 728 a subset  $X \subseteq \mathbb{R}^n$ , and two different inputs cannot produce the same output. The threshold function thus forces the  
 729 map to have some degeneracy.

730 Here we treat this map as a very general input-output system. However, this matrix map can also be seen as  
 731 simple a neural network, made only by the input and output layers, each with  $n$  neurons, having a step function as  
 732 its activation function, and no hidden layers. Although this perspective is not explored in this paper, it is interesting  
 733 to note that thinking of a neural network as a matrix map translates the machine learning task of finding a set of  
 734 weights that minimises a cost function to the task of finding an input-output map with certain desired properties. A  
 735 similar system was used as a very simple model of transcriptional gene networks in ref. 49, where it was shown that  
 736 this map can generate biased outputs.

737 The space of possible matrices is very large, so we begin with a very simple random  $20 \times 20$  matrix where every  
 738 entry is chosen from  $\{-1, 1\}$  with uniform probability. Supplementary Figure 17a shows that this map generates a  
 739 very biased distribution of inputs over outputs, but, in sharp contrast to the other systems studied in this paper,  
 740 there is no bias towards simpler or more complex outputs, as it can be seen in Supplementary Figure 17b.

741 To show that most maps have a bias in their input-output maps, we use a very simple bias ratio measure, first  
 742 introduced in ref. 41. If one takes the entropy of the distribution of the probabilities  $p_i$  of the  $N_O$  outputs,  $H =$

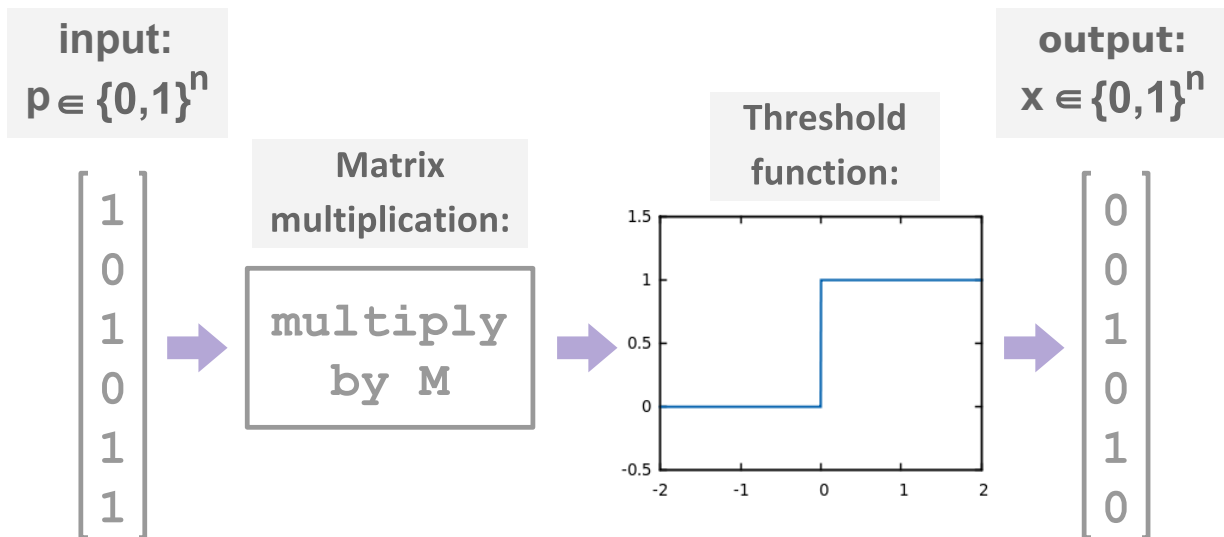

Supplementary Figure 16. Illustration of an input-output map consisting in binary vectors multiplied by a matrix, following by a binary threshold so that the output also consists in binary vectors.

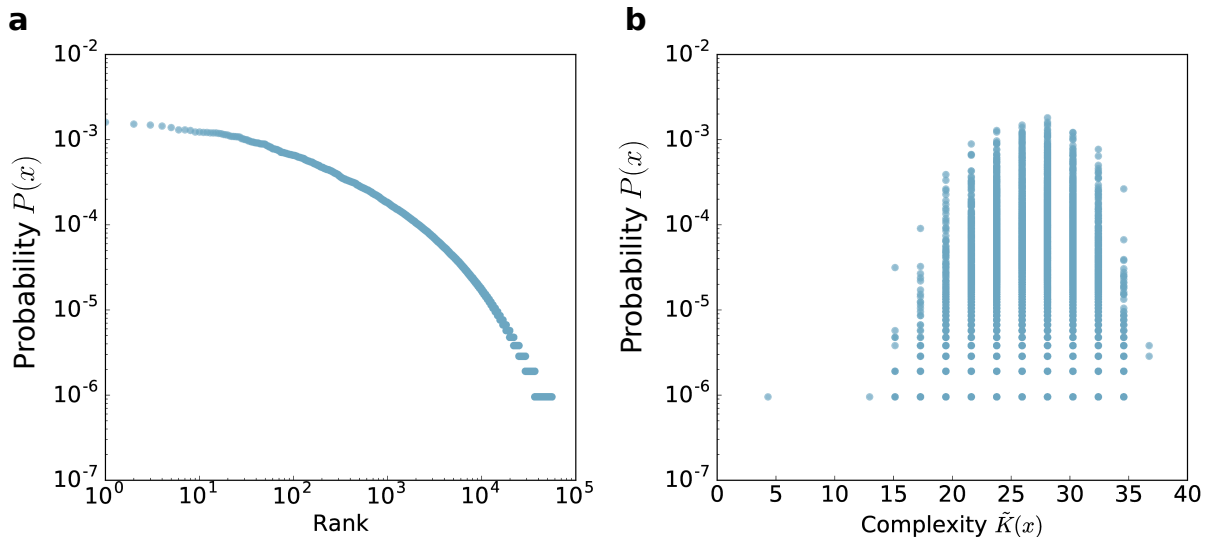

Supplementary Figure 17. Properties of a matrix map made from a random  $20 \times 20$  matrix where every entry is chosen from  $\{-1, 1\}$  with uniform probability. **(a)** A rank plot shows that the map exhibits bias in that certain outputs are much more likely to occur than others. **(b)** However, in contrast to simplicity bias phenomenology, there is no clear correlation between probability and complexity of the output.

743  $-\sum_{i=1}^{N_O} p_i \log_2 p_i$ , then the exponential of the entropy,  $2^H$ , should be a rough estimate of the effective number of  
 744 outputs<sup>50</sup>. One can then define a *bias ratio*  $\beta = 2^H/N_O$ , which measures the ratio between the effective number of  
 745 outputs and the total number of outputs in that map. For maps with  $\beta \approx 1$ , inputs should be roughly uniformly  
 746 distributed across outputs, while for maps with  $\beta \ll 1$ , most inputs should correspond to a few outputs. In other  
 747 words, the closer  $\beta$  is to 0, the stronger the bias in the distribution of inputs over outputs. For example, the map in  
 748 Supplementary Figure 17 has a bias parameter  $\beta = 0.56$ . In Supplementary Figure 18a we show a histogram produced  
 749 from an ensemble of 5000 matrices where each of the  $20 \times 20$  entries was chosen uniformly from  $\{-1, 1\}$ . We observe  
 750 that most matrix maps in that ensemble have small  $\beta$ , and so most inputs map to a small fraction of the outputs.  
 751 The maps show bias.

752 For this same set of 5000 matrices we calculated the probability that a given output string would appear. We then  
 753 measured the complexity of each output, and generated a distribution of outputs probability versus complexity. As  
 754 can be seen in Supplementary Figure 18b, the distribution of these strings is very close to what we would expect

755 by random sampling of the outputs, or in fact random sampling of all binary strings of length 20. We also sampled  
 756 over 5000 random  $20 \times 20$  matrices where every entry is taken from a standard normal distribution ( $\mu = 0, \sigma = 1$ ),  
 757 finding very similar results. We distinguish in the plot between input sampling and output sampling. The former  
 758 takes averages over outputs generated by uniform random sampling of inputs that are fed into the map, and the latter  
 759 simply samples uniformly over the outputs found. For an individual matrix with bias, input and output sampling can  
 760 vary significantly, depending on the amount of bias. However, when we subsequently average over the matrices, this  
 761 difference goes away. For the matrices with randomly chosen  $\{-1, 1\}$  entries, there remains a very slight difference  
 762 between input and output sampling, while for the matrices with entries taken from a standard normal distribution  
 763 input and output sampling yield essentially the same results within our measurement errors. In other words, while  
 764 for a single matrix with bias, certain outputs are much more likely to be generated by random sampling of inputs  
 765 than others, when averaged over many matrices, no output string is more or less likely to be generated than any  
 766 other. This behaviour is fundamentally different from maps that show simplicity bias, because even if we averaged  
 767 over maps, we would expect low complexity outputs strings to be more likely to occur on average.

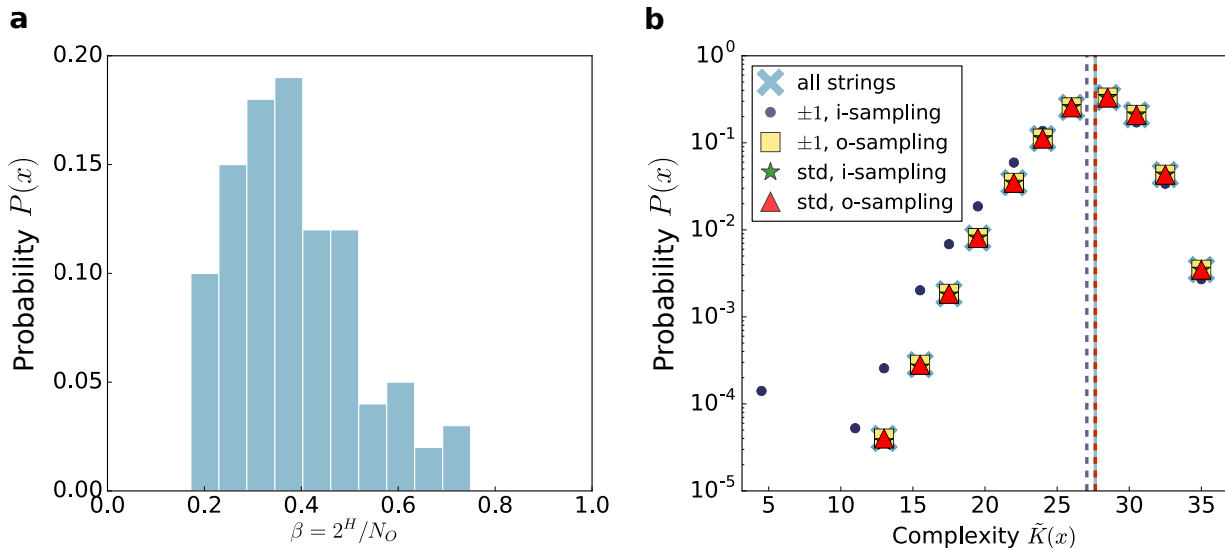

Supplementary Figure 18. (a) Histogram for the bias ratio  $\beta$ , a measure for the ratio between the number of effective outputs and the total number of outputs of a map. Smaller values of  $\beta$  mean more bias in the map. The map in Supplementary Figure 17 has a bias parameter  $\beta = 0.56$ . (b) Distribution of  $\tilde{K}(x)$  for the outputs of matrix maps from an ensemble of random  $20 \times 20$  matrices with entries chosen uniformly from  $\{-1, 1\}$ . Dark blue circles denote a distribution made by sampling inputs and yellow squares denote a distribution made by uniformly sampling over outputs. The green stars and red triangles respectively represent the same input-sampled and output-sampled averages, but for random  $20 \times 20$  matrices with taken from a standard normal distribution ( $\mu = 0, \sigma = 1$ ). The light blue crosses represent the distribution of  $\tilde{K}(x)$  over all bitstrings of length 20. The overlap between all curves shows that the outputs of a random matrix map are likely to be as complex as a random set of strings of the same length. Error bars are too small to be visible, and average values are all within  $27.3 \pm 0.3$ .

768

### Circulant matrices

769 All the matrix maps considered so far were made from random matrices, with entries either taken from  $\{-1, 1\}$  or  
 770 from a normal distribution of mean zero and variance 1. In other words, for square matrices, the amount of information  
 771 needed to specify the map grows as  $n^2$ . In this section we study a set of matrix maps for which the amount of  
 772 information needed to specify the map grows more slowly with  $n$ . We begin by studying circulant matrices, illustrated  
 773 in Supplementary Figure 19a. Circulant matrices are a class of Toeplitz matrices where each row corresponds to the  
 774 row above, shifted to the right by one element. They play a role in fields ranging from discrete Fourier transforms  
 775 to cryptography<sup>51</sup>. In this work, their most important aspect is that these matrices are defined by the values on the  
 776 first row. Limiting our matrix entries to  $\{-1, 1\}$ , a circulant matrix can be defined using  $n$  bits or less, as opposed to  
 777  $n^2$  bits for a random  $\{-1, 1\}$  matrix. These matrices are illustrated in Supplementary Figure 19a.

778 While the outputs from the random matrix maps explored in the previous section were, on average, as complex as  
 779 any random binary string of the same length, some circulant matrix maps do show some bias towards simple outputs  
 780 (Some fully random maps may also show simplicity bias, but these are sufficiently rare that we do not find any in our

781 sampling). Supplementary Figure 19c, shows the ratio between  $\tilde{K}_o$ , the average output complexity when all outputs  
 782 are assigned the same weight, and  $\tilde{K}_i$ , the average output complexity where every output is weighed by the frequency  
 783 with which it appears upon random sampling of inputs. The majority of maps have  $\tilde{K}_o/\tilde{K}_i$  close to one, but a small  
 784 fraction (a few %) have significantly higher ratios, which mean that low complexity outputs are more likely to appear  
 785 upon random sampling of inputs.

786 The main correlating factor for matrices that have high values of  $\tilde{K}_o/\tilde{K}_i$  is that the complexity  $\tilde{K}(\text{row})$  of the  
 787 top row which determines the whole matrix is low. We showed this in the main text in Figure 2, which is repeated  
 788 above as Supplementary Figure 19d for clarity. This behaviour is what we would expect from our general derivation  
 789 of simplicity bias, which relies on the map itself being having a limited complexity.

790 To check that this bias towards simpler output presented by a small fraction of the circulant matrix maps could not  
 791 be attributed to the matrices having low rank we also measure the rank of each matrix. As shown in Supplementary  
 792 Figure 19b for an ensemble of 25000 circulant matrices with  $20 \times 20$  entries taken from  $\{-1, 1\}$ , most matrices have  
 793 a matrix rank close to its maximum of 20, with 93.8% of the matrices having a rank of 20. We also confirmed that  
 794 the matrices with high values of  $\tilde{K}_o/\tilde{K}_i$  do not have low rank on average.

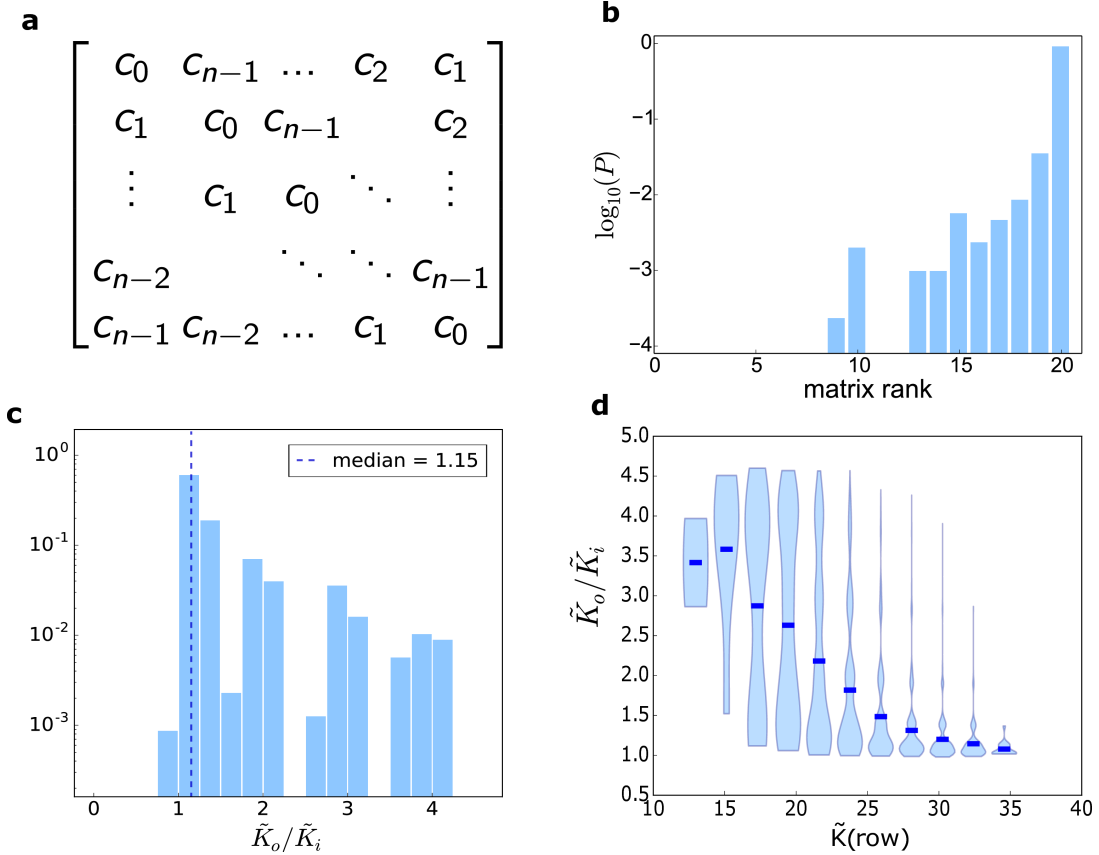

Supplementary Figure 19. **(a)** Illustration of a circulant matrix. **(b)** Histogram for the matrix rank of 25000 circulant matrices with  $20 \times 20$  entries taken from  $\{-1, 1\}$ . **(c)** Histogram for the ratio  $\tilde{K}_o/\tilde{K}_i$  in the matrix maps made from the same matrices. **(d)** Violin plots showing how  $\tilde{K}_o/\tilde{K}_i$  changes with the complexity of the top row of the same circulant matrices. Also shown as Figure 2 in the main text.

795

*Low complexity circulant matrices show simplicity bias*

796 We can explore this behaviour in more detail by creating circulant matrices with low complexity rows. We limited  
 797 the  $\{-1, 1\}$  matrix ensemble to  $20 \times 20$  circulant matrices defined by rows containing  $\log n$  positive entries (and  
 798 negative entries otherwise). Those matrices, by construction, are defined by  $\mathcal{O}(\log^2 n)$  bits, a much smaller amount  
 799 of information when compared to the  $n \times n$  bits required to specify each entry of a random matrix with entries taken  
 800 randomly from  $\{-1, 1\}$ , or the  $n$  bits to define most circulant matrices in the full ensemble (Note that most strings

801 of length  $n$  have (near) maximum (or modal for  $C_{LZ}$ ) complexity). For the matrix maps made from these simpler  
 802 matrices, the evidence for simplicity bias is clear: all maps show a ratio  $\tilde{K}_o/\tilde{K}_i > 3.5$ .

803 Since those matrices will consist in 320 entries equal to  $-1$  and 80 entries equal to  $+1$ , we ran a control using  
 804 using matrices with these same proportions, but without the row-by-row structure, as well as matrices with the same  
 805 proportion of  $+1$  and  $-1$  per row (16 : 4), but without the Toeplitz structure. We tested both alternatives, but none  
 806 showed simplicity bias as the simple matrices described in this section do. This can be attributed to the fact that  
 807 these maps need not  $\mathcal{O}(\log^2 n)$  bits to be described, but  $\mathcal{O}(n \log n)$ , since all row structure is lost. They thus violate  
 808 our limited complexity condition that  $K(f) + K(n) \ll K(x)$ .

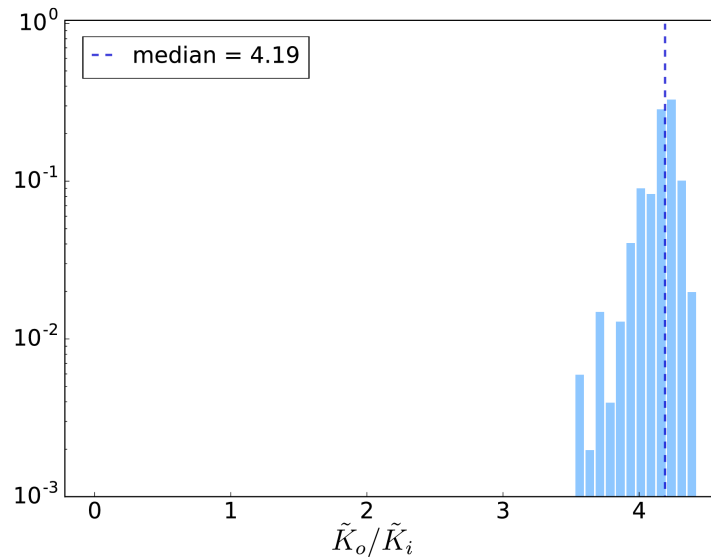

Supplementary Figure 20. Histogram for  $\tilde{K}_o/\tilde{K}_i$  for  $20 \times 20$  circulant matrices with entries taken from  $\{-1, 1\}$ , containing only  $\lceil \log 20 \rceil = 4$  positive entries per row.

809

*Rank and sparsity do not explain simplicity bias in the matrix map*

810 Rank and sparsity are two traditional measures for the complexity of matrices. As another control, we consider  
 811  $10 \times 10$  matrices of rank and sparsity varying from 1 to their maximum values of 10 and 100 respectively.

812 Firstly, in Supplementary Figure 21 we show violin plots for the output complexity of random  $10 \times 10$  matrix maps  
 813 made from random  $\{-1, 1\}$  matrices versus rank. As the matrix rank decreases from 10 to 1, both  $\tilde{K}_o$  and  $\tilde{K}_i$  deviate  
 814 from the full-rank matrices. Supplementary Figure 21c, however, shows that the ratio  $\tilde{K}_o/\tilde{K}_i$  stays constant. In other  
 815 words, even though matrix maps made from matrices of lower rank do produce low complexity outputs, that is not  
 816 because those outputs correspond to more inputs than their high complexity counterparts, but rather because the  
 817 high complexity outputs are not being produced at all. In an extreme case, a matrix of rank one will produce the  
 818 simplest possible outputs, but nothing more than that.

819 The second natural candidate for the complexity of a matrix map is the sparsity of its matrix, i.e. the number of  
 820 zeros in the matrix. As shown in Supplementary Figure 22 for  $10 \times 10$  matrices,  $\tilde{K}_o$  and  $\tilde{K}_i$  remain the same for levels  
 821 of sparsity up to 80%, and drop sharply for sparser matrices. Still, the ratio  $\tilde{K}_o/\tilde{K}_i$ , remains around 1, indicating once  
 822 again a decrease in output complexity but no bias towards producing simpler outputs over more complex outputs.

823 In summary, even though rank and sparsity are used as proxies for matrix complexity in other contexts, we have  
 824 presented evidence that they only affect the average output complexity of a matrix map when at extreme values of  
 825 either low rank or high sparsity. Even in these cases, the ratio  $\tilde{K}_o/\tilde{K}_i$  remains around 1. This means that within  
 826 all the outputs produced by these low-rank or high-sparsity matrix maps, there is no bias towards producing simpler  
 827 outputs with a higher probability .

828 On the other hand, we have shown that one can define simple matrix maps without resorting to low-rank or sparse  
 829 matrices, by using circulant  $\{-1, 1\}$  matrices with a small number of positive entries on each row - approximately  
 830  $\log n$  elements on a  $n \times n$  matrix. And as mentioned above, the matrix maps from this ensemble can be defined  
 831 with  $\mathcal{O}(\log^2 n)$  bits of information. While in the main text and in Supplementary Note 3 we mainly treat maps of

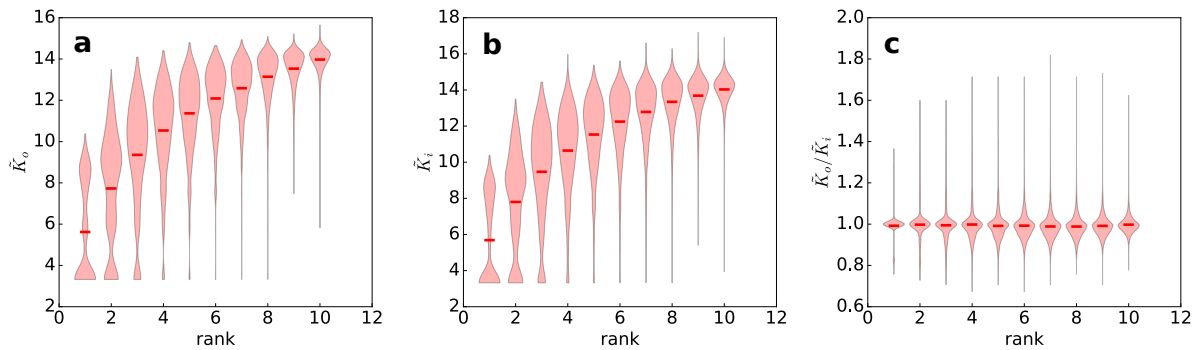

Supplementary Figure 21. Violin plots for the complexity of random  $\{-1, 1\}$  matrix maps made from  $10 \times 10$  matrices as a function of rank.  $\tilde{K}_o$  in (a) shows the average output complexity, while  $\tilde{K}_i$  in (b) shows the average output complexity where each output is weighed by its frequency, i.e. the fraction of inputs that correspond to it. Figure (c) shows the ratio  $\tilde{K}_o/\tilde{K}_i$ . Red lines mark the average values in all violin plots.

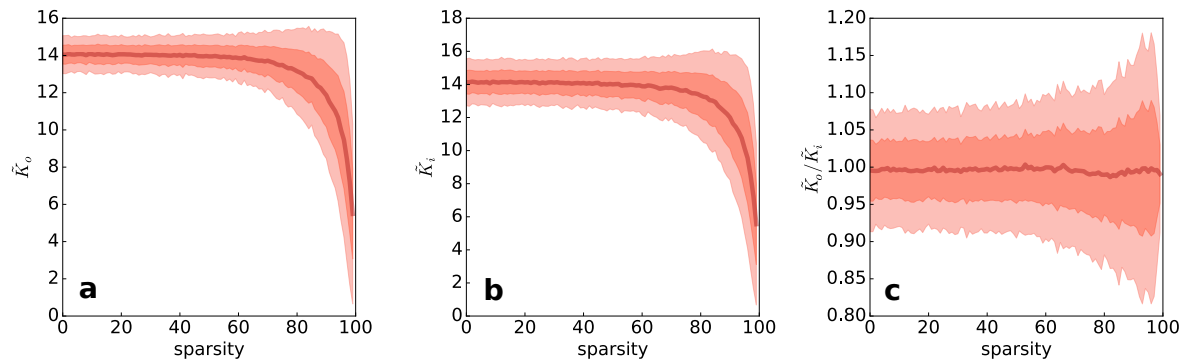

Supplementary Figure 22. Output complexity of random  $\{-1, 1\}$  matrix maps made from  $10 \times 10$  matrices, versus matrix sparsity.  $\tilde{K}_o$  in (a) shows the average output complexity, while  $\tilde{K}_i$  in (b) shows the average output complexity where each output is weighed by its frequency, i.e. the fraction of inputs that correspond to it. Panel (c) shows the ratio  $\tilde{K}_o/\tilde{K}_i$ . The darkest red lines represent the average  $\tilde{K}_o$ ,  $\tilde{K}_i$  and their ratio  $\tilde{K}_o/\tilde{K}_i$ , and the lighter shades of red represent one and two standard deviations.

832 fixed complexity, if maps grow only as  $\log^2 n$  then for large enough  $n$  the requirement that  $K(f) \ll K(x)$  should  
 833 always hold. However, we only tried an extremely small range of  $\log n$  so these conclusions are very preliminary.  
 834 Again, as discussed earlier, we find clear simplicity bias phenomenology even when we may not quite be in the limit  
 835 of  $K(f) \ll K(x)$ . This suggests that the large  $n$  asymptotic behaviour persists down to smaller maps. We have not  
 836 yet explored how small the matrix maps should be for finite size effects, discussed for example in Supplementary Note  
 837 9, to start kicking in.

---

838 <sup>1</sup> M. Li and P.M.B. Vitanyi. *An introduction to Kolmogorov complexity and its applications*. Springer-Verlag New York Inc,  
 839 2008.  
 840 <sup>2</sup> C.S. Calude. *Information and randomness: An algorithmic perspective*. Springer, 2002.  
 841 <sup>3</sup> P. Gács. *Lecture notes on descriptive complexity and randomness*. Boston University, Graduate School of Arts and Sciences,  
 842 Computer Science Department, 1988.  
 843 <sup>4</sup> K.F. Riley, M.P. Hobson, and S.J. Bence. *Mathematical methods for physics and engineering*. Cambridge University Press,  
 844 2006.  
 845 <sup>5</sup> Alan Mathison Turing. On computable numbers, with an application to the entscheidungsproblem. *J. of Math*, 58(345-363):5,  
 846 1936.  
 847 <sup>6</sup> I.L. Hofacker, W. Fontana, P.F. Stadler, L.S. Bonhoeffer, M. Tacker, and P. Schuster. Fast folding and comparison of RNA  
 848 secondary structures. *Monatshefte für Chemie/Chemical Monthly*, 125(2):167–188, 1994.

- 849 <sup>7</sup> Seth Lloyd. Quantum-mechanical computers and uncomputability. *Physical review letters*, 71(6):943, 1993.
- 850 <sup>8</sup> Toby S Cubitt, David Perez-Garcia, and Michael M Wolf. Undecidability of the spectral gap. *Nature*, 528(7581):207–211,  
851 2015.
- 852 <sup>9</sup> R. J. Solomonoff. A preliminary report on a general theory of inductive inference (revision of report v-131). *Contract AF*,  
853 49(639):376, 1960.
- 854 <sup>10</sup> A.N. Kolmogorov. Three approaches to the quantitative definition of information. *Problems of information transmission*,  
855 1(1):1–7, 1965.
- 856 <sup>11</sup> G.J. Chaitin. *Algorithmic information theory*. Cambridge University Press, 1987.
- 857 <sup>12</sup> Gregory J Chaitin. A theory of program size formally identical to information theory. *Journal of the ACM (JACM)*,  
858 22(3):329–340, 1975.
- 859 <sup>13</sup> Peter Grunwald and Paul Vitányi. Shannon information and Kolmogorov complexity. *arXiv preprint cs/0410002*, 2004.
- 860 <sup>14</sup> L.A. Levin. Laws of information conservation (nongrowth) and aspects of the foundation of probability theory. *Problemy*  
861 *Peredachi Informatsii*, 10(3):30–35, 1974.
- 862 <sup>15</sup> TM Cover and J.A. Thomas. *Elements of information theory*. John Wiley and Sons, 2006.
- 863 <sup>16</sup> The  $K(f)$  that is relevant in this case is not the complexity of the full Vienna package, but simply the minimal amount  
864 of information needed to find the lowest free-energy secondary structure for a given sequence. The amount of information  
865 may be still be rather small, as it only needs as input thermodynamic model used, which is quite simple, combined with  
866 some way to search over all possible structures. In contrast to the Vienna package, for example, computing speed is not  
867 important. Nevertheless, it is likely that  $K(f)$  will be larger than the complexity of many simple  $L = 20$  outputs which can  
868 be described in less than 32 bits).
- 869 <sup>17</sup> Walter Rudin. *Functional analysis*. Tata McGraw-Hill, 1991.
- 870 <sup>18</sup> Markov's inequality is a standard result: if  $z$  is nonnegative random variable distributed according to a probability distri-  
871 bution  $P(z)$ , then  $P(z > a) < E_z/a$ , where  $E_z$  is the expected value of  $z$  given  $P(z)$ . If  $\bar{z} = z/E_z$  then  $P(\bar{z} > r) < 1/r$ .
- 872 <sup>19</sup> F. Kaspar and HG Schuster. Easily calculable measure for the complexity of spatiotemporal patterns. *Physical Review A*,  
873 36(2):842, 1987.
- 874 <sup>20</sup> Thomas Schürmann and Peter Grassberger. Entropy estimation of symbol sequences. *Chaos: An Interdisciplinary Journal*  
875 *of Nonlinear Science*, 6(3):414–427, 1996.
- 876 <sup>21</sup> E. Rivals, O. Delgrange, J.P. Delahaye, M. Dauchet, M.O. Delorme, A. Hénaut, and E. Ollivier. Detection of significant  
877 patterns by compression algorithms: the case of approximate tandem repeats in DNA sequences. *Computer applications in*  
878 *the biosciences: CABIOS*, 13(2):131–136, 1997.
- 879 <sup>22</sup> P. Ferragina, R. Giancarlo, V. Greco, G. Manzini, and G. Valiente. Compression-based classification of biological sequences  
880 and structures via the universal similarity metric: experimental assessment. *BMC bioinformatics*, 8(1):252, 2007.
- 881 <sup>23</sup> M. Li, J.H. Badger, X. Chen, S. Kwong, P. Kearney, and H. Zhang. An information-based sequence distance and its  
882 application to whole mitochondrial genome phylogeny. *Bioinformatics*, 17(2):149–154, 2001.
- 883 <sup>24</sup> X. Chen, B. Francia, M. Li, B. Mckinnon, and A. Seker. Shared information and program plagiarism detection. *Information*  
884 *Theory, IEEE Transactions on*, 50(7):1545–1551, 2004.
- 885 <sup>25</sup> R. Cilibrasi, P. Vitányi, and R. Wolf. Algorithmic clustering of music based on string compression. *Computer Music Journal*,  
886 28(4):49–67, 2004.
- 887 <sup>26</sup> Annick Lesne, Jean-Luc Blanc, and Laurent Pezard. Entropy estimation of very short symbolic sequences. *Physical Review*  
888 *E*, 79(4):046208, 2009.
- 889 <sup>27</sup> H. Zenil and J.P. Delahaye. An algorithmic information theoretic approach to the behaviour of financial markets. *Journal*  
890 *of Economic Surveys*, 25(3):431–463, 2011.
- 891 <sup>28</sup> Coco Krumme, Alejandro Llorente, Manuel Cebrian, Esteban Moro, et al. The predictability of consumer visitation patterns.  
892 *Scientific reports*, 3, 2013.
- 893 <sup>29</sup> Paul MB Vitányi. Similarity and denoising. *Philosophical Transactions of the Royal Society A: Mathematical, Physical and*  
894 *Engineering Sciences*, 371(1984), 2013.
- 895 <sup>30</sup> Annick Lesne. Shannon entropy: a rigorous notion at the crossroads between probability, information theory, dynamical  
896 systems and statistical physics. *Mathematical Structures in Computer Science*, 24(03):e240311, 2014.
- 897 <sup>31</sup> C. Adami and N. J. Cerf. Physical complexity of symbolic sequences. *Physica D*, 137(1):62–69, 2000.
- 898 <sup>32</sup> A. Lempel and J. Ziv. On the complexity of finite sequences. *Information Theory, IEEE Transactions on*, 22(1):75–81, 1976.
- 899 <sup>33</sup> Jacob Ziv and Abraham Lempel. Compression of individual sequences via variable-rate coding. *IEEE transactions on*  
900 *Information Theory*, 24(5):530–536, 1978.
- 901 <sup>34</sup> José M Amigó, Janusz Szczepeński, Elek Wajuryb, and Maria V Sanchez-Vives. Estimating the entropy rate of spike trains  
902 via lempel-ziv complexity. *Neural Computation*, 16(4):717–736, 2004.
- 903 <sup>35</sup> E Estevez-Rams, R Lora Serrano, B Aragón Fernández, and I Brito Reyes. On the non-randomness of maximum lempel ziv  
904 complexity sequences of finite size. *Chaos: An Interdisciplinary Journal of Nonlinear Science*, 23(2):023118, 2013.
- 905 <sup>36</sup> Jacob Ziv and Abraham Lempel. A universal algorithm for sequential data compression. *IEEE Transactions on information*  
906 *theory*, 23(3):337–343, 1977.
- 907 <sup>37</sup> J.P. Delahaye and H. Zenil. Numerical evaluation of algorithmic complexity for short strings: A glance into the innermost  
908 structure of algorithmic randomness. *Appl. Math. Comput.*, 219:63–77, 2012.
- 909 <sup>38</sup> Hector Zenil, Fernando Soler-Toscano, Jean-Paul Delahaye, and Nicolas Gauvrit. Two-dimensional Kolmogorov complexity  
910 and an empirical validation of the coding theorem method by compressibility. *PeerJ Computer Science*, 1:e23, 2015.
- 911 <sup>39</sup> Fernando Soler-Toscano, Hector Zenil, Jean-Paul Delahaye, and Nicolas Gauvrit. Calculating Kolmogorov complexity from  
912 the output frequency distributions of small Turing machines. *PLoS one*, 9(5):e96223, 2014.



- 913 <sup>40</sup> Hector Zenil, Fernando Soler-Toscano, Kamaludin Dingle, and Ard A Louis. Correlation of automorphism group size and  
914 topological properties with program-size complexity evaluations of graphs and complex networks. *Physica A: Statistical*  
915 *Mechanics and its Applications*, 404:341–358, 2014.
- 916 <sup>41</sup> Kamaludin Dingle, Steffen Schaper, and Ard A Louis. The structure of the genotype–phenotype map strongly constrains  
917 the evolution of non-coding RNA. *Interface focus*, 5(6):20150053, 2015.
- 918 <sup>42</sup> J.M.G. Vilar, H.Y. Kueh, N. Barkai, and S. Leibler. Mechanisms of noise-resistance in genetic oscillators. *Proceedings of the*  
919 *National Academy of Sciences of the United States of America*, 99(9):5988, 2002.
- 920 <sup>43</sup> K. Willbrand, F. Radvanyi, J.P. Nadal, J.P. Thiery, and T.M.A. Fink. Identifying genes from up–down properties of  
921 microarray expression series. *Bioinformatics*, 21(20):3859–3864, 2005.
- 922 <sup>44</sup> T.M.A. Fink, K. Willbrand, and F.C.S. Brown. 1-d random landscapes and non-random data series. *EPL (Europhysics*  
923 *Letters)*, 79(3):38006, 2007.
- 924 <sup>45</sup> K.C. Chen, L. Calzone, A. Csikasz-Nagy, F.R. Cross, B. Novak, and J.J. Tyson. Integrative analysis of cell cycle control in  
925 budding yeast. *Molecular Biology of the Cell*, 15(8):3841, 2004.
- 926 <sup>46</sup> Geoffrey Grimmett and David Stirzaker. *Probability and random processes*. Oxford University Press, 2001.
- 927 <sup>47</sup> Terence Tao, Van Vu, Manjunath Krishnapur, et al. Random matrices: universality of ESDs and the circular law. *The*  
928 *Annals of Probability*, 38(5):2023–2065, 2010.
- 929 <sup>48</sup> Alan Edelman and Eric Kostlan. How many zeros of a random polynomial are real? *Bulletin of the American Mathematical*  
930 *Society*, 32(1):1–37, 1995.
- 931 <sup>49</sup> E. Borenstein and D.C. Krakauer. An end to endless forms: epistasis, phenotype distribution bias, and nonuniform evolution.  
932 *PLoS Comput Biol*, 4(10):e1000202, 2008.
- 933 <sup>50</sup> M. Mezard and A. Montanari. *Information, physics, and computation*. Oxford University Press, USA, 2009.
- 934 <sup>51</sup> Robert M Gray. *Toeplitz and circulant matrices: A review*. Now Publishers Inc, 2006.
